# Supplementary material
Source: ML conference proceedings conference paper supplement (https://openreview.net/forum?id=ZvUZvT8tgg)
Supplement: supplementary_material [file unscaled_noisy_reactor_data.xlsx]

## Sheet: Sheet1
v0	v_He	T	dt	L	F_C6H6
1157.75	845.247	1272.93	0.574868	30.6737	40.9735
773.891	1319.69	998.564	0.746985	88.0986	43.3684
1484.77	476.682	1201.21	1.64094	77.3763	42.6528
817.682	536.649	1123.28	0.715068	86.0681	32.7456
1162.73	1262.03	1256.59	1.95136	92.2931	40.3126
1271.02	683.798	1083.93	1.12758	38.1006	44.4457
1157.18	1013.55	1028.29	1.68788	59.2646	47.8949
1332.48	1492.66	1234.66	1.27789	51.9404	55.0599
762.852	716.862	1170.31	0.618183	88.5957	29.0253
686.031	479.956	1109.04	0.846407	91.1405	23.5399
608.779	1379.94	1324.33	1.92907	17.0692	33.2483
911.999	598.375	1185.8	1.44995	17.3963	36.6709
1415.21	898.829	1264.15	1.75492	78.9219	43.5969
1264.5	866.707	1283.39	1.87716	67.9775	37.9486
698.664	616.859	1059.83	1.51753	77.8863	24.2377
1134.42	516.435	1171.26	1.35284	37.3963	37.1902
577.839	524.592	1010.53	1.24433	81.0595	23.1376
680.34	1130.4	1339.97	0.742855	56.1057	30.491
893.244	1236.1	1032.43	1.84485	40.2978	43.7989
940.531	1474.45	1259.78	1.81864	68.3163	34.2775
947.181	1210.36	1016.76	1.76735	26.8644	43.103
480.833	1016.43	1320.44	1.78965	16.0448	26.1009
573.446	954.863	1025.51	1.01432	69.3664	29.6856
1330.72	1222.23	1009.29	1.02835	38.215	60.6746
835.187	1035.35	1206.22	1.87743	64.2113	33.8754
696.5	1006.75	1296.15	1.26389	37.4292	26.7988
1468.36	594.043	1060.74	1.95455	25.2673	50.496
1089.46	1244.23	1027.06	1.66449	34.298	51.6672
776.401	923.532	1323.57	0.557598	53.6037	35.3568
755.642	864.526	1133.84	0.839518	85.4476	33.3411
603.043	579.782	1088.39	1.89561	71.3628	18.7384
1118.74	675.729	1327.76	1.08374	35.0919	37.3906
1330.41	1092.96	1094.89	1.54188	40.1511	51.9884
1179.02	1405.05	1090.06	0.525999	22.0505	30.6115
786.065	459.957	1183.21	1.79549	81.39	20.353
1180.36	554.168	1136.67	1.23257	40.6664	39.6374
647.668	774.696	1088.89	0.609425	89.8307	30.6503
483.576	483.205	1199.06	1.55219	87.051	14.8071
610.935	1114.64	1070.39	1.77055	86.1531	21.7216
985.652	503.087	1034.01	1.82589	29.9076	34.3188
629.939	499.393	1063.36	0.986106	99.4763	18.7045
767.971	1219.59	1278.6	1.98704	81.4663	21.105
579.342	1295.86	1079.46	1.47577	76.9085	22.6398
899.077	1104.41	1285.65	0.996421	83.8623	37.5696
770.235	1167.39	1265.65	0.52005	43.064	34.552
627.191	653.275	1320.29	1.02024	17.1137	24.7028
691.193	1085.47	1152.66	0.789874	90.2162	28.5013
503.067	563.356	1246.37	1.67729	65.3692	15.7451
941.253	838.852	1316.2	1.89968	22.6232	31.0491
711.087	1172.66	1027.56	1.29481	10.5857	42.4328
871.172	1175.15	1148.59	0.576245	45.2207	40.6284
518.584	1094.42	1339.34	0.915987	88.2201	20.7707
937.118	599.051	1079.78	1.92458	48.9118	30.4458
1289.3	1075.85	1283.43	1.83346	97.2823	35.4549
596.195	1246.77	1100.54	1.34519	55.5177	30.1632
1395.26	1492.22	1315.93	0.625965	54.3738	56.7445
1220.84	475.81	1246.74	1.78874	94.7955	31.3393
1097.65	865.702	1255.81	1.79617	23.6278	40.9205
591.447	1404.73	1095.02	0.882025	29.9546	38.0764
453.115	897.043	1196.41	1.92593	76.6005	11.6579
1312.63	1320.31	1027.4	0.724281	15.9727	44.7961
894.956	1100.65	1089.02	1.69907	93.3231	31.5166
975.789	1307.93	1196.35	1.84516	17.9572	45.3005
1466.45	762.744	1001.12	1.09754	22.5864	54.7155
696.502	1464.93	1189.57	1.40384	54.0971	34.6384
632.725	522.692	1042.79	1.4462	49.6524	22.3244
1260.89	924.53	1193.21	1.55628	64.4911	39.2829
1123.45	971.341	1339.12	1.23291	57.4087	39.1049
893.43	718.127	1280.14	0.530329	45.0649	30.9172
1453.65	947.425	1096.47	1.45454	28.7893	56.6435
796.465	686.251	1298.13	1.68345	47.0136	26.8247
1457.33	1169.25	1150.58	1.89992	52.7159	53.6416
1081.6	1297.76	1064.64	0.572928	93.8483	54.3183
1141.31	621.004	1089.83	1.71019	51.7262	35.4781
1033.55	953.893	1329.04	1.91287	85.016	29.9473
641.071	752.194	1310.18	1.38193	75.0261	18.2712
1390.05	1065.77	1043.87	0.71458	38.663	57.3114
920.412	731.919	1297.32	1.91324	90.1322	22.9738
1386.43	860.007	1268.43	1.62345	80.3143	40.5366
563.118	905.281	1293.68	0.79194	72.1337	23.2766
648.708	1392.04	1154.06	1.68579	76.8165	23.9782
1025.73	608.23	1190.11	1.12844	34.5457	37.5233
1176.07	1208.62	1253.23	1.51286	54.4792	45.0836
952.989	509.502	1204.58	1.41341	66.7276	25.0554
590.289	668.174	999.107	1.83379	59.5456	24.9989
959.674	1335.63	1129.37	1.35491	87.366	43.206
629.374	916.162	1317.1	1.1882	52.452	26.7824
1465.9	1200.6	1027.38	1.12319	10.7012	58.6501
1396.28	691.334	1225.93	1.00196	74.8542	41.4684
1342.75	939.858	1275.68	1.7253	43.4922	46.8484
1143.85	1157	1321.86	1.94915	15.0953	45.5083
492.7	1304.95	1318.34	1.72317	35.2633	25.8556
614.887	1144.18	1175.73	0.891574	76.4376	29.2128
1426.02	1083.58	1004.84	1.50548	45.1122	61.4171
1339.95	896.985	1037.09	1.09937	35.5426	55.3856
1439.21	610.589	1271.18	1.26853	19.8909	47.4368
528.065	525.312	1106.39	0.582689	61.9967	21.8239
688.128	984.436	1078.64	0.903006	18.2992	40.6835
557.706	698.347	1289.28	1.89901	98.7971	12.6474
978.352	832.6	1038.53	1.35016	17.5803	44.8232
1166.43	861.179	1333.72	0.932381	81.0984	41.2844
959.219	757.339	1269.34	1.03732	50.1065	30.957
944.676	1486.72	1203.05	1.79891	83.6698	32.8931
917.677	1348.22	1244.77	1.24967	53.2041	42.2114
1460.3	684.618	997.406	1.75668	34.3731	51.0562
459.295	1066.34	1191.21	1.43379	94.188	18.1891
1181.38	1258.57	1107.32	1.38878	36.1442	52.2777
1460.12	752.341	1039.03	0.647805	49.1716	53.7028
1023.61	1211.08	1158.67	1.91669	68.1701	41.8173
1224.63	930.758	1086.2	1.90802	18.4836	53.5001
663.134	1133.32	1000.06	0.998937	66.2296	38.9387
483.463	1081.34	1248.33	1.17855	91.7014	18.8466
870.313	680.344	1237.34	1.86917	96.6883	21.2617
1007.72	1213.15	1028.82	0.788949	79.8808	52.0739
1061.08	1035.14	1165.06	1.61896	11.9655	46.6526
661.326	562.758	1302.22	1.51484	47.726	22.0782
1149.54	481.978	1008.72	1.82872	22.0626	42.9785
612.891	1315.82	1344.38	1.42564	26.1842	30.9944
1445.19	978.992	1141.95	1.89047	83.5823	47.6773
578.555	1468.4	1177.46	0.984551	58.252	34.3357
694.86	885.356	1260.78	1.6077	68.2782	23.7043
748.134	573.076	1328.49	0.89883	13.3496	24.7485
623.347	858.437	1018.21	0.715104	40.5093	33.8471
1414.35	616.578	1244.52	1.42011	68.1052	43.7312
1215.8	1227.92	1022.26	0.557061	54.0232	55.3418
682.806	1142.08	1137.44	1.74383	15.3251	37.092
967.848	936.457	1317.57	1.12282	34.5764	36.1815
839.069	1114.17	1082.8	1.58279	25.7454	45.3421
1482.56	1438.63	1256	0.620472	33.955	53.0114
1427.57	1297.6	1318.12	1.67405	25.8937	55.5402
493.29	1463.86	1250.2	0.883062	59.5423	26.096
1217.91	610.923	1338.32	0.955429	67.735	36.925
851.707	1162.54	1049.17	0.766977	49.3124	43.1035
1443.04	849.399	1003.39	1.58534	35.7974	56.4008
866.949	1031.77	1044.02	1.84744	30.7745	39.1017
1428.53	711.384	1176.07	1.5778	11.1985	52.1567
1034.55	590.526	1034.41	1.53155	34.9088	39.2784
640.174	986.235	1202.26	0.908273	57.8566	28.4841
704.051	1352.81	1111.72	0.72146	72.0221	39.5058
1140.97	571.278	1309.9	0.885658	87.9313	30.8214
1186.43	1067.66	1089.37	1.70888	41.1761	45.342
702.812	745.234	1331.11	0.625485	54.7201	28.0546
681.672	1104.75	1202.6	1.25731	83.2423	26.6397
559.866	644.411	1294.78	1.02426	79.96	19.1359
945.99	831.899	1107	1.14994	13.296	46.2817
1120.59	1179.4	1231.75	1.14483	22.4276	50.6806
1238.03	1206.48	1053.8	1.27791	41.6754	53.71
1133.2	1396.39	1233.63	0.501497	14.289	21.6398
512.695	1004.98	1140.36	1.54208	70.3795	17.0789
533.466	813.277	1280.3	1.90767	49.7341	16.8004
1456.73	1016.83	1068.87	1.40291	52.0405	55.9433
1231.69	831.579	1050.78	1.67737	29.0297	52.0426
1340.19	1282.78	1310.62	1.539	11.1018	52.8638
1403.69	1353.07	1196.72	1.75728	28.4307	56.5336
594.532	950.755	1026.63	0.563133	36.2608	33.7762
1010.69	1090.7	1019.01	1.27587	27.6379	48.1556
1216.22	1033.92	1272.15	1.19939	91.0236	42.3683
554.8	1047.92	1087.62	1.77264	84.5153	17.2526
834.678	1005.87	1163.31	0.507722	85.7232	35.1479
1207.95	1144.3	1118.54	1.98816	24.5482	50.6635
626.684	1159.12	1264.53	0.905839	63.9274	27.7739
524.744	1380.47	1133.06	0.89787	88.2825	30.9896
1321.08	846.865	1064.65	1.22153	16.6223	55.584
644.293	985.56	1270.72	1.79943	69.648	20.934
825.026	513.572	1272.6	1.69061	33.1627	23.3672
1431.04	712.988	1248.89	1.88038	19.8186	48.8401
1434.98	1134	1051.55	1.43448	18.9265	61.0242
1110.14	764.478	1095.58	1.27766	52.7591	37.7301
1028.72	1203	1258	0.588072	35.3633	44.1054
542.172	888.579	1229.56	0.541839	33.0736	27.7087
516.99	934.736	1117.12	0.709938	40.7198	30.5608
1328.85	477.762	1051.73	1.24138	27.34	46.1867
565.347	936.64	1170.06	1.81609	94.7982	17.7548
1008.84	982.203	1264.82	1.48878	97.4007	29.8458
1038.65	579.284	1249.93	0.89322	98.3827	28.8925
726.26	491.767	1231.2	1.76714	44.5243	23.3673
1432.12	1242.1	1175.03	0.73931	51.1622	57.2528
1362.82	927.413	1308.63	1.07306	51.0478	44.6889
1429.92	1066.73	1070.41	1.88758	93.0856	47.7419
1098.21	1173.9	1128.02	1.53396	27.3935	49.3255
1354.76	645.936	1092.83	1.68936	58.3124	43.1506
1365.02	498.349	1086.52	1.77235	54.933	39.2627
738.987	460.262	1337.18	1.82918	27.8154	20.9301
1327.85	625.095	1300.3	1.32406	14.6408	38.7647
1181.98	1115.97	999.455	1.16047	80.7314	51.4762
1476.22	488.891	1205.91	1.26439	28.7778	42.2022
1222.05	1149.76	1008.49	1.51741	70.3753	48.3866
1427.37	657.162	1199.03	0.967488	67.2527	45.3892
1182.99	1376.75	1239.22	1.78502	72.6667	41.3244
897.093	1389	1139.79	1.3415	70.9235	43.0144
790.031	1252.05	1247.77	1.3783	26.7142	35.9157
624.304	985.122	1066.85	0.541889	49.1867	34.9012
628.728	950.01	1011.94	0.813728	35.0584	35.2207
507.876	1150.9	1121.57	1.60492	83.1962	16.2233
463.917	1491.49	1083.78	0.874188	93.9576	26.7764
1198.36	569.813	1120.2	0.524814	11.7029	18.328
858.304	878.507	1116.22	0.844312	60.8498	37.765
1297.24	1278.25	1231.41	1.10095	28.2673	56.5182
1192.64	982.853	1298.15	0.67155	80.242	47.2666
837.207	1271.3	1286.78	0.866025	24.7069	43.3452
519.236	890.768	1004.5	1.70225	59.1166	21.7228
679.31	997.602	1067.19	1.56597	31.1412	33.3019
739.42	530.418	1058.83	0.856591	33.2921	31.9946
785.043	1299.36	1153.99	0.905833	75.9037	38.7488
1474.03	1222.6	1101.77	1.94537	38.5395	60.1284
867.763	1483.02	1323.89	1.20569	63.676	33.905
941.551	551.322	1041.3	1.36308	30.4881	35.3333
485.906	931.965	1089.32	0.859715	82.1466	21.331
1483.22	1047.56	1325.51	1.34687	95.3217	45.4091
1208.13	1385.47	1296.39	1.99106	43.7057	45.698
717.183	808.082	1241	0.62366	95.81	29.2682
1099.33	1103.01	1172.49	0.911612	29.7101	48.8874
1252.97	1291.87	1124.3	0.972132	82.8285	53.7094
668.244	1403.54	1186.47	1.34852	60.3547	30.9422
862.54	519.04	1263.26	0.65361	77.9503	25.6725
1421.37	539.668	1097.73	0.757369	39.4381	47.5057
685.886	490.184	1109.78	0.843264	44.1665	25.6788
1119.87	1362.42	1208.07	1.71547	87.2395	40.6999
886.211	540	1062.76	1.18681	74.8228	34.2935
1269.1	1417.77	1293.87	0.729819	10.366	27.4083
1223.91	1106.66	1319.13	1.13356	56.1905	42.1661
456.696	910.728	1105.2	1.1493	55.3472	21.107
1035.25	539.904	1151.11	1.41724	93.0205	29.1641
964.098	671.004	1010.37	1.58466	62.6628	35.7971
1085.11	1472.75	1265.43	1.75809	64.3756	38.5658
1148.53	705.809	1241.45	1.36526	85.9461	34.209
877.015	560.274	1193.27	1.21051	82.3561	26.9031
1254.45	1399.61	1270.55	0.634146	31.4668	47.741
704.609	1109.9	1121.84	1.45576	72.5292	27.7637
587.58	1275.45	1077.74	1.96321	30.2309	32.2799
1237.22	642.147	1298.29	1.25792	96.3322	31.425
543.324	1350.44	1222.19	1.56132	20.4074	31.5719
1016.22	712.992	1104.56	1.24109	43.9883	36.878
555.928	527.803	1147.97	1.34865	12.7473	24.7613
972.371	1284.71	1209.76	1.90285	90.5734	30.1559
1394.92	929.009	1110.99	0.607139	72.6832	55.3437
773.083	1439.82	1135.01	0.773449	22.9455	46.7849
1154.07	792.071	1309.48	0.596869	41.341	35.3753
683.135	1230.38	1344.57	0.654334	95.9181	30.3428
821.708	1447.71	1267.3	1.02461	86.3376	36.6062
981.017	617.69	1070.07	0.590211	18.7831	30.4489
970.366	457.022	1079.04	1.39072	90.7726	28.173
1235.53	779.187	1044.69	0.734221	22.9935	47.0746
686.121	1467.18	1279.97	0.65635	31.553	37.2252
1145.64	837.85	1214.95	1.23085	71.382	37.7378
904.581	877.738	1269.46	1.00565	61.4387	29.7281
1257.75	614.915	1154.69	0.863338	42.3498	45.6238
788.333	1212.45	1303.61	1.10735	47.3652	36.779
505.292	831.837	1294.21	1.9811	55.5576	13.8355
578.268	777.14	1192.62	0.952898	97.3395	17.5853
1093.75	542.767	1161.92	0.702299	87.5852	36.4676
1475.71	844.552	1317.08	1.76035	36.0889	45.4254
953.457	592.966	1114.74	1.62365	91.609	28.6259
1126.15	459.881	1280.31	1.24285	70.8491	30.4082
538.772	986.242	1203.73	1.96168	62.5928	19.5722
814.74	1197.86	1181.4	0.60854	94.2558	39.1692
772.774	1397.96	1267.17	1.02609	27.6779	39.3901
648.53	947.086	1074.53	1.7919	75.1822	21.0338
724.663	1318.36	1268.06	1.40737	58.1701	27.8545
907.017	668.349	1024.2	1.07881	99.6719	33.3734
1316.68	1286.24	1135	0.656678	64.0036	55.0843
1121.47	519.413	1130.52	1.55588	74.1149	32.4432
722.235	950.713	1075.86	1.10231	43.037	33.2684
1437.17	511.689	1080.85	1.11338	69.4546	45.453
988.044	1127.32	1243.46	1.16537	45.7281	36.8477
773.689	476.714	1300.33	1.31175	44.0941	23.7892
955.759	1249.32	1184.86	1.38295	54.8543	41.6968
1407.75	1048.95	1232.43	0.668732	37.0656	51.3769
1148.52	780.211	1072.89	0.690421	98.2971	42.373
1307.39	1079.44	1248.83	1.43713	65.4019	45.3053
1334.46	529.496	1015.18	1.21509	15.3064	49.938
627.195	1114.56	1277.92	1.53723	73.1096	16.5838
852.45	653.305	1135.97	0.811871	76.6065	34.769
1093.57	476.72	1324.34	0.742471	99.9466	31.2243
1144.35	482.118	1285.94	1.70978	65.9217	29.2551
1477.42	1201.86	1234.98	1.28064	31.1042	56.7059
1363.58	1368.11	1289.29	1.45559	23.2341	57.1939
469.982	551.728	1198.23	1.31943	91.8057	12.7668
840.193	1416.69	1026.71	1.63528	52.2285	38.9745
1181.55	569.8	1174.37	0.99427	43.6925	43.4212
1422.3	1413.69	1344.28	1.36854	14.6948	57.0345
980.564	591.649	1208.93	1.8748	99.5863	27.8016
1336.03	1345.07	1128.87	0.755402	61.4648	57.703
1492.73	1073.27	1220.95	0.855051	48.7435	58.9423
701.739	1159.52	1269.86	1.30227	11.3012	37.0763
788.631	879.063	1041.67	0.948649	69.4511	35.6622
658.594	1273	1164.06	1.3049	14.0989	37.0165
1074.86	1341.27	1199.94	0.811379	27.3252	52.1827
680.083	671.246	1301.81	1.27524	49.7681	24.4118
1013.59	473.999	1104.72	1.24726	86.8006	33.2728
1365.14	1128.78	1065.07	1.73632	10.2315	59.7248
1088.88	805.125	1305.37	1.03074	12.0125	37.2328
1141.3	1264.58	1071.87	1.96155	87.4013	46.8423
1145.1	1256.13	1070.81	1.84538	58.9583	45.1435
519.693	1343.22	1307.7	1.21473	95.6227	17.7898
681.778	1443.06	1222.64	0.768479	16.2261	38.1923
628.103	1326.25	1044.5	0.964003	14.88	41.3559
846.052	997.869	1098.56	1.46056	41.0027	38.4576
1247.68	591.794	1001.61	1.2471	33.981	45.6135
1056.01	535.951	1282.58	1.12528	81.8897	30.7106
741.07	1279.95	1334.23	0.900297	18.9357	34.2949
1282.69	1458.43	1171.73	1.00612	42.7971	61.6513
859.355	1051.6	1326.78	0.645034	71.3627	34.7114
1042.03	691.353	1070.72	1.11784	54.366	37.3629
1147.95	1199.64	1070.42	1.95467	85.7011	43.2877
621.846	866.676	1031.66	1.11877	23.6165	32.3684
549.247	495.463	1256.15	1.97246	10.592	18.5796
1195.95	1490.75	1317.22	0.916353	98.7457	43.5391
866.771	475.836	1042.89	0.712745	82.4851	31.8864
1238.09	1115.88	1074.7	1.05406	73.6646	50.3626
541.849	1360.06	1109.1	1.80315	79.5496	20.4567
1427.3	858.012	1149.55	0.580904	45.2472	52.8162
934.956	1339.21	1326.49	1.41093	50.6087	35.7752
1483.73	650.742	1104.47	0.923875	66.6464	48.2945
639.426	1250.92	1277.11	0.789177	88.2103	27.8394
1381.58	1098.78	1114.69	1.32094	36.5867	56.2742
1459.61	1087.8	1030.34	1.07472	50.5026	60.8283
1402.03	1411.81	1084.35	1.34491	10.4419	62.5347
1048.56	729.125	1085.58	1.97427	48.8088	36.3943
1338.8	515.75	1094.59	0.809387	89.9958	42.5409
1433.95	1487.17	1033.68	0.916164	85.742	63.7763
1174.99	1099.16	1276.45	0.855484	18.9235	42.9191
1269.08	1390.94	1309.26	1.62734	99.8789	41.4994
1072.16	526.854	1254.93	1.38957	25.5007	32.6808
451.74	879.352	1106.81	1.0941	90.3368	15.3355
1356.92	801.375	1283.76	1.30566	18.6638	46.5755
1195.71	1145.96	1012.78	1.72471	64.1045	48.8533
525.913	866.819	1098.85	0.800308	77.9066	28.7771
1140.2	1318.77	1038.41	0.720929	72.1254	54.0464
1399.59	1310.73	1119.97	1.13852	15.3848	62.7193
466.719	825.749	1093.14	0.697788	47.8669	26.5985
1102.98	1082.56	1088.75	1.39457	24.6445	47.561
1371.23	1081.31	1096.46	0.688011	97.7919	55.9872
1339.78	797.486	1026.83	0.662269	14.9419	34.8575
1355.29	966.888	1094.57	1.78988	94.0631	39.2619
1273.22	859.069	1277.65	1.24869	43.4461	44.5683
742.584	1112.45	1192.87	1.24336	18.1943	34.5816
615.35	1115.02	1252.98	0.899835	93.0383	26.0077
1133.74	567.767	1161.69	1.90028	26.6963	36.2152
1357.43	561.516	1121.26	0.865892	77.7406	47.0013
1214.91	924.651	1303.94	0.663113	61.7943	45.7338
483.378	1444.33	1175.12	0.724555	72.152	27.9481
1182.61	1354.48	1137.7	1.33987	26.5715	54.2068
682.164	469.85	1266.67	1.67134	20.3048	20.6522
1209.73	1484.95	1334.37	1.49172	13.052	52.7397
1248.6	472.846	1158.88	1.77446	27.5505	38.6704
611.771	490.454	1263.56	0.563666	30.8857	22.1043
818.959	845.768	1326.9	1.83086	95.6068	21.6692
1459.04	982.307	1073.95	0.83753	87.7046	56.5682
993.853	906.452	1186.92	0.950412	37.5798	41.3134
592.414	1249.32	1116.09	1.74591	76.1577	21.7851
1317.94	776.423	1319.9	1.25194	24.4444	41.4378
694.225	666.101	1328.98	1.97093	53.9458	22.7065
737.28	1044.9	1199.16	1.04748	11.4331	34.6744
578.4	1450.38	1346.76	1.32861	76.6038	20.9686
1492.33	607.492	1145.21	1.07453	76.1094	45.5621
755.024	1287.72	1166.53	0.716011	20.6611	34.7957
467.969	886.859	1081.7	0.795971	10.7769	25.5554
1169.17	1106.5	1082.68	0.65365	63.7764	50.8499
1423.28	489.458	1136.81	0.589487	66.3892	46.8834
826.211	770.313	1132.61	0.795101	78.4206	33.4272
860.253	494.367	1021.86	0.908599	46.4187	32.2978
1381.87	460.603	1016.96	1.01534	64.6383	47.5268
801.052	717.556	998.444	1.49285	23.371	36.728
1171.32	578.973	1088.92	1.46464	40.2344	40.0444
941.433	1067.41	1107.49	0.960234	68.209	41.0629
1453.07	785.383	1146.98	0.741199	42.5047	51.9293
1245.43	899.769	1257.99	0.6435	21.1195	36.0348
683.47	1323.71	1010.52	0.942475	19.7274	43.9916
1204.85	505.867	1000.85	1.49985	74.2403	36.9632
1461.76	1159.92	1200.43	0.758891	21.8062	50.9286
735.771	458.269	1231.29	1.14833	72.1871	19.6611
1366.13	737.598	1214.3	1.26762	21.781	49.4667
778.946	1028.8	1107.49	1.50767	55.6144	32.4337
1101.81	593.459	1143.95	1.63227	30.4974	37.7576
1471.37	478.749	1172.58	0.903072	76.3351	44.8668
1259.35	1019.91	1082.81	1.60236	81.5333	46.4481
997.933	798.372	1049.23	0.626529	86.8685	37.5048
1296.53	788.694	1240.25	1.47017	41.395	42.7381
1480.89	856.762	1141.07	1.60377	41.7414	53.5338
1288.64	1175.17	1070.58	1.01553	15.9737	52.9571
1031.38	698.344	1131.31	0.612714	23.3751	36.6207
798.299	772.603	1055.95	1.12009	80.6666	26.0985
1378.73	944.704	1035.93	1.34161	46.9466	52.4644
501.908	915.372	1301.08	1.40281	74.8149	16.2872
950.424	1433.11	1170.78	1.05017	84.8679	38.8124
1276.77	1378.96	1207.43	1.7234	85.3849	43.332
1033.35	1110.42	1096.79	0.630152	69.8569	44.1563
699.126	513.575	1280.27	1.93421	97.9155	19.4531
915.111	1478.85	1313.76	0.659105	48.9739	44.5225
865.71	1101.64	1332.28	1.08317	95.6728	30.9187
1319.23	1079.08	1070.59	0.930066	78.4516	52.6851
867.996	1258.83	1328.89	0.971956	28.4281	39.5944
1040.19	962.566	1198.95	1.28092	21.3004	40.2908
717.03	1005.71	1318.7	1.59118	18.1287	31.588
960.753	667.681	1189.48	0.671762	51.842	33.9634
651.729	543.664	1124.76	0.668186	54.2222	27.2513
641.928	762.781	1329.87	1.82742	61.0414	21.2091
1233.47	768.945	1315.68	1.49281	91.7814	37.3981
492.807	651.335	1139.72	1.25658	38.5162	22.5053
646.365	594.088	1272.33	0.706051	69.5101	21.5428
749.963	842.087	1036.19	1.4744	56.7574	28.8084
1335.85	1189.69	1115.65	1.48687	35.6651	57.4086
784.989	980.424	1162.88	0.559034	79.93	36.0968
557.221	1249.61	1272.61	1.85965	94.6895	10.9974
882.621	1230.74	1098.48	0.923749	28.4961	47.1121
747.478	1249.82	1265.66	1.3627	95.7787	27.9513
1114.16	471.216	1207.37	1.3652	45.2914	33.8223
1385.48	693.544	1247.1	0.855313	38.9497	45.7092
526.887	915.128	1233	0.515203	91.8424	22.7351
998.513	1079.34	1047.47	1.75458	31.6352	42.6427
915.975	1170.13	1340.82	0.685371	68.3646	39.4943
510.655	909.331	1132.89	0.924303	92.9238	20.4837
1067.68	605.603	1293.9	1.12368	80.4883	30.6135
949.969	550.269	1314.04	0.749256	82.4856	32.1844
1412.34	1462.28	1306.15	1.59969	60.5131	53.0166
990.007	687.668	1248.96	1.82331	93.5371	27.4426
473.811	978.558	1128.99	1.7487	77.3625	15.9975
1460.8	559.487	1047.27	1.7367	72.899	48.5732
578.623	846.375	1013.89	0.879705	84.6463	29.9319
603.435	506.349	1087.52	1.51028	89.1363	19.7116
1336.76	1212.96	1194.36	1.02982	30.3835	57.1064
677.554	1490.08	1248.64	0.882891	23.264	35.7315
702.152	884.625	1160.5	1.38807	78.1917	25.4401
966.792	1084.5	1192.45	1.80007	79.7399	32.4936
607.248	1459.65	1095.64	1.63628	84.4752	25.7657
957.162	945.134	1288.82	0.969755	36.8591	39.7708
908.317	592.174	1323.3	1.25877	94.1769	19.1792
572	1006.25	1121.6	1.35042	62.6279	23.6997
1214.45	666.48	1013.4	1.21527	25.3537	48.2148
1231.13	944.864	1233.08	0.730274	96.3256	42.5627
1115.64	781.173	1162.65	1.91287	71.4143	32.0061
1070.52	624.684	1208.74	0.585317	68.6131	38.5958
859.918	1325.64	1172.35	0.669047	34.6468	44.5279
1118.82	1116.68	1231.79	1.44357	47.5328	41.0886
503.71	1398.76	1159.17	0.604358	12.468	24.069
587.274	611.965	998.421	0.789266	27.4014	30.2886
1130.6	652.352	1049.17	1.11571	81.4971	39.153
1115.15	1207.68	1111.63	0.918476	25.0374	53.964
1114.94	1257.46	1176.82	0.735977	71.6248	48.8405
1474.66	585.924	1007.55	0.77047	75.4021	50.9811
513.34	1097.52	1041.03	1.09861	89.7219	21.4668
495.422	590.414	1200.21	0.688912	33.6511	21.7002
1326.37	928.007	1284.63	1.09547	71.1723	44.1191
780.04	1434.06	1304.53	1.63246	39.6254	37.248
740.344	539.126	1027.45	0.588327	54.3951	30.1406
966.993	1395.25	1311.22	1.55106	66.205	37.6832
1297.08	690.639	1150.47	1.27114	16.9296	45.3391
1329.39	1337.91	1221.25	1.85887	30.103	52.7025
923.117	1284.65	1058.81	1.59329	51.0876	43.1355
953.276	769.568	1283.55	1.24304	11.8982	34.648
1191.26	550.236	1099.1	0.501334	63.1816	43.1771
907.018	1429.83	1009.59	1.1845	90.9403	44.9357
1236.27	567.47	1131.21	0.611827	27.9916	40.4181
882.613	760.182	1000.38	1.9692	99.7634	29.0785
1003.27	1388.68	1232.66	1.31159	71.3656	44.9533
1259.93	569.397	1243.49	1.20658	68.3269	36.2037
1302.82	1337.16	1188.06	1.4925	18.2131	53.5981
1025.56	1186.64	1007.8	0.664528	19.697	44.235
919.97	931.078	1249.09	1.94614	36.2008	33.734
774.151	1283.3	998.991	1.64616	33.9907	41.9575
719.794	880.816	1209.85	0.767655	73.4725	27.4721
1491.66	1139.37	1099.47	0.575863	85.8964	59.5897
799.277	692.569	1265.1	1.03595	20.6261	31.6961
607.397	750.27	1315.41	0.562547	27.0307	24.1174
1193.13	762.608	1183.61	0.626742	19.9276	40.031
596.037	1306.24	1316.9	0.650357	42.6258	30.7244
867.022	593.346	1176.86	1.15919	61.4979	27.2148
1152.6	1012.18	1049.95	1.51465	18.6319	47.4885
1049.24	1450.24	1137.29	0.911794	88.9775	48.198
829.021	1496.02	1031.52	1.81819	48.5698	39.201
1445.84	735.961	1192.68	0.664119	60.7203	48.2382
1448.6	1109.93	1016.73	1.37477	81.8809	55.8244
1090.43	475.626	1073.71	1.39564	49.4117	34.2184
776.013	1238.01	1307.98	1.49178	90.2653	29.4358
1409.81	992.082	1239.08	1.58745	55.6309	49.3366
936.792	1392.41	1192.65	1.53703	53.3605	43.782
490.796	634.158	1334.01	1.1989	76.8948	12.6312
589.221	1083.39	1124.26	1.35278	13.8859	37.0289
1348.19	1117.12	1171.84	0.955449	85.1558	51.3743
468.652	626.995	1327.16	1.95443	77.8421	11.8994
1027.42	820.362	1013.95	0.728168	41.6319	47.3183
674.72	1287.13	1143.22	1.46058	96.9589	23.8795
579.565	860.287	1112.18	1.86958	43.5618	23.0158
610.966	657.85	1332.05	1.50525	14.5852	26.2317
689.289	1454.76	1289.27	1.69631	18.1574	32.5816
1152.87	845.458	1147.06	0.962579	66.6761	45.408
750.469	504.321	1153.88	0.611156	65.9257	27.9952
1328.82	834.718	1194.25	1.13183	11.8116	47.4883
494.177	1168.7	1247.41	1.20749	30.7293	27.5761
1120.58	934.524	1093.48	1.93148	48.6493	39.8402
470.052	522.974	1207.91	1.53704	46.0344	14.93
1353.45	696.055	1150.55	1.55005	62.9841	45.2204
962.341	971.656	1318.15	1.09921	91.587	34.2827
1393.45	1480.39	1217.55	0.794616	42.4645	65.8885
1323.71	1090.94	1168.57	1.0575	44.309	52.5025
1301.91	1169.93	1328.49	1.4107	68.124	42.5859
461.068	699.449	1045.62	1.67061	54.0519	17.0681
489.753	799.156	1273.53	0.572776	26.8527	21.8104
588.515	947.693	1248.22	0.933242	57.1246	25.5379
905.697	662.814	1124.95	1.03028	36.6568	35.6545
804.295	614.138	1008.94	1.21359	59.1277	30.6972
1251.75	738.753	997.381	0.883837	73.8369	50.0807
716.443	745.177	1158.82	0.86042	58.9031	28.3315
689.735	1099.79	1304.98	1.43612	29.941	30.4003
1285.09	1454.78	1236.47	0.512317	22.0511	28.5971
1288.63	1174.67	1155.55	1.38336	30.8184	50.7243
1307.44	1009.3	1115.17	0.662102	20.0616	39.2323
1150.78	1123.93	1288.95	1.16791	83.9507	37.5722
635.443	829.767	1121.38	0.564185	18.4293	29.1016
1442.14	1367.19	1204.95	1.78653	84.8875	51.6944
497.53	461.672	1187.2	1.24223	52.2698	19.1832
480.039	868.237	1348.73	1.56039	35.1282	16.5861
1042.89	772.573	1210.89	1.00703	23.988	36.1993
639.771	1035.5	1238.9	1.60029	61.4923	22.5902
830.029	1414.79	1064.4	1.98274	59.5065	38.1205
502.55	888.063	1100.66	1.10352	84.689	21.4357
655.273	1276.1	1042.07	0.559424	41.401	42.4772
1109.54	893.585	1336.14	0.723991	97.9158	37.4495
1235.06	1477.63	1225.18	0.845556	84.0501	55.6717
628.621	455.827	1302.84	1.06879	38.6871	19.9556
731.009	1469.51	1223.44	0.625135	94.3423	35.5198
611.044	726.086	1184.31	0.728712	20.3938	24.6956
674.155	1005.64	1028.41	0.841675	58.9841	32.9864
877.73	1263.14	1247.64	0.544343	48.0776	41.246
543.584	1352.32	1007.78	1.24856	10.8142	38.7191
1052.56	545.888	1072.12	0.693092	28.6613	40.8667
682.805	919.304	1239.52	1.64173	38.6749	30.1881
1190.33	917.034	1148.15	1.74598	41.4712	39.1035
1071.34	1364.13	1177.52	0.780719	57.6295	51.7249
1107.55	584.882	1314.86	1.58645	10.5375	32.4802
571.184	916.302	1299.97	1.7688	39.3441	22.8049
855.426	905.663	1062.15	1.46698	39.6888	39.6424
1069.44	740.627	1289.68	1.40551	85.6499	31.2829
1410.73	622.911	1279.9	1.94937	39.4596	38.789
1107.8	1131.97	1207.09	1.2621	19.0213	47.3508
647.595	1435.69	1020.74	0.924835	73.6908	37.5682
1192.9	489.798	1254.34	1.54045	91.8502	31.0294
1063.38	1255.22	1139.72	1.49136	68.6953	42.4834
1471.11	991.123	1167.66	0.842104	84.8505	52.5793
1233.15	562.695	1072.76	1.17097	32.1022	44.088
710.309	731.281	1082.2	0.557428	61.3992	29.2986
1227.39	550.907	1195.96	1.51468	72.0648	35.1484
1023.95	902.723	1317.05	0.683279	44.3298	41.799
1194.86	1193.86	1029.76	0.648728	84.4968	54.1322
858.802	1292.12	1252.12	0.704848	82.7436	37.715
496.198	485.422	1169.02	1.89306	45.2841	17.7251
1005.96	675.056	1168.72	1.90437	96.2352	22.9942
1041.28	1211.94	1263.29	0.70921	36.4799	47.5205
1061.15	1202.32	1110.32	0.985397	18.5111	49.1943
1033.5	748.255	1138.03	0.968065	55.9623	38.6656
989.353	450.147	1340.08	1.17381	11.6653	31.3502
753.703	1013.84	1346.3	1.65145	66.3135	26.4539
769.541	1309.09	1105.51	1.56838	23.0096	42.0273
669.282	1101.38	1296.43	1.20991	39.2941	28.7284
820.595	597.327	1191.97	1.16291	29.1246	32.8677
1329.53	488.667	1177.18	1.61359	82.1398	32.3049
1307.8	1013.75	1291.78	1.23622	26.5553	48.7293
975.349	689.102	1295.44	0.504111	17.7903	18.5515
692.102	1177.48	1139.62	0.931809	94.527	29.155
1345.42	1489.36	1268.14	1.53397	26.3775	61.6211
1403.6	1188.03	1042.38	0.592984	45.5595	59.3472
852.719	1294.19	1175.93	1.45885	26.1864	43.1853
689.668	609.112	1094.57	1.2656	45.2196	22.831
830.683	1473.33	1298.86	1.37583	76.2079	31.6911
1015.34	1367.33	1265.85	1.65407	60.7363	39.7572
1346.98	1313.17	1042.92	1.66979	69.9555	55.8375
1180.48	1186.86	1019.52	1.2701	75.7077	51.6299
1393.04	802.575	1081.74	1.03527	92.3711	48.2111
1244.4	998.694	1210.42	0.567846	69.2057	49.0095
1219.48	840.03	1152.32	0.549278	35.7412	43.2626
604.213	1191.75	1086.43	1.18465	61.0953	26.8822
567.167	1149.24	1161.81	1.43783	57.7574	25.5534
1074.57	1055.05	1085.71	1.43608	74.8932	43.0774
684.212	737.42	1216.2	1.08663	19.525	30.9765
1480.57	1158.23	1169.99	1.42324	32.7172	57.5134
1111.82	896.508	1269.33	0.94617	33.5505	40.5123
802.469	627.679	1180.33	1.9519	82.7671	20.1196
1018.58	665.972	1020.12	0.85754	10.944	37.0458
815.972	1052.09	1046.31	1.65415	80.4353	34.2288
838.037	872.311	1214.18	1.42269	29.4591	30.2431
730.652	812.486	1340.28	1.12598	44.9626	25.6253
480.43	1356.15	1244.56	0.9542	96.9507	18.0839
1405.34	1187.9	1133.72	1.88294	49.5118	54.916
836.901	520.414	1335.48	0.961459	88.9975	22.4118
704.532	1043.61	1286.33	0.84184	55.2491	29.9137
672.928	832.477	1311.77	1.9515	95.0936	15.9886
1292.62	1348.07	1186.01	1.77255	24.2619	56.9724
615.636	1167.25	1053.75	1.32174	86.8037	26.1888
699.239	1307.2	1064.4	1.10528	76.7172	28.8777
1112.9	925.502	1010.38	1.3458	91.4247	43.1495
606.833	1198.07	1041	1.12684	10.5855	39.6785
734.194	1328.79	1066.65	0.801328	87.798	37.9428
1153.43	1267.92	1099.01	1.06421	25.8241	53.0933
936.415	1283.58	1055.55	1.98125	46.104	43.5473
1315.21	1447.65	1005.17	1.31531	86.3753	59.0867
823.002	673.289	1022.87	0.964468	81.9034	30.5747
887.836	1077.12	1211.77	1.13293	89.1265	32.6352
1257.31	484.403	1147.2	0.946862	42.6838	38.8017
1062.24	684.43	1255.54	1.95629	53.2889	31.4981
942.252	1250.14	1014.18	0.505332	12.862	18.3505
1011.78	900.973	1120.12	1.84997	96.6287	32.6835
499.283	729.138	1169.52	1.90461	46.1404	16.0873
649.502	1111.89	1181.59	1.68432	29.1067	32.1817
1119.42	620.571	1249.5	0.952221	91.6145	30.9449
926.692	592.663	1140.25	1.37111	39.3197	31.2946
1069.55	740.861	1221.59	0.99006	66.2184	36.0919
483.122	566.375	1092.73	1.08075	87.3212	13.1664
565.83	1420.51	1030.04	0.539446	54.9526	39.9044
778.849	1238.03	1071.99	0.573458	16.3615	28.9066
998.47	1269.51	1282.45	1.43629	14.3072	42.6226
1098.16	914.58	1219.71	1.13033	89.4482	34.4276
862.809	1023.16	1204.48	1.24204	72.3043	33.9235
1168.97	1063.12	1077.04	1.7333	10.5641	55.4207
883.465	1078.69	1187.83	0.814788	74.2902	37.2559
805.258	454.476	1250.69	1.53822	61.5621	23.4344
1441.21	1009.94	1273.67	1.64904	38.2481	50.0482
645.486	1162.93	1244.58	1.51114	62.708	26.2741
1026.46	509.283	1106.89	0.799217	72.5423	36.9613
1430.92	613.634	1130.76	0.692403	38.4161	45.7157
520.789	1258.38	1293.57	1.74768	44.1492	23.8536
1364.96	1090.15	1346.9	1.4629	41.5795	46.3336
765.254	1492.81	1195.35	1.61431	52.0492	35.6026
1432.35	937.535	1017.41	1.89638	55.8701	52.64
1465.16	1492.4	1229.7	1.4295	11.2525	61.327
814.074	608.637	1014.04	1.38299	83.3019	25.6558
855.073	598.337	1310.11	1.46118	24.0054	29.4042
570.931	1427.13	1190.4	1.73143	98.54	21.1928
1390.16	1499.75	1221.48	1.92934	95.2952	46.8943
752.165	1442.64	1235.63	1.64982	72.9412	29.8553
1361.51	1477.77	1192.52	1.46838	21.4652	60.1781
1422.96	1197.01	1119.13	0.592003	39.3964	54.4159
1492.75	464.198	1078.84	0.91222	24.0664	50.6006
1427.11	1038.06	1119.2	1.62301	88.9015	47.6291
717.104	944.52	1061.3	1.41172	20.9443	35.7756
1405.73	1261.5	1090.41	1.89828	17.6602	63.2665
1022.56	1415.81	1311	1.11854	58.8511	40.9892
943.262	782.341	1346.46	1.2943	85.129	28.2196
653.191	526.953	1315.2	1.62608	72.4988	18.8164
961.259	1384.07	1202.27	1.82913	40.2297	45.1825
816.128	763.062	1199.38	1.65156	67.5315	26.2527
1055.18	1381.65	1116.66	1.39245	12.577	57.0007
1251.79	490.468	1041.25	1.51679	25.5435	45.5516
1274.57	712.806	1274.35	1.37511	51.0634	37.8105
450.042	882.838	1323.07	0.823025	33.1752	19.9797
471.813	1426.3	998.523	1.93961	80.2836	18.0983
1250.79	729.736	1150.53	1.80753	29.4416	45.8944
1451.33	1191.19	1341.38	0.836551	97.2238	49.2126
1044.48	777.727	1331.14	1.67401	84.4893	27.7006
795.24	531.422	1041.26	0.823909	63.6657	32.9068
895.223	1409.32	1060.82	1.13212	36.9412	49.8448
466.229	482.299	1219.49	1.88154	26.7284	11.7561
1065.7	688.108	1315.77	1.50465	67.3224	31.6427
1380.45	489.103	1280.68	0.825424	42.3034	42.3605
544.27	1167.3	1312.81	1.60969	65.9613	19.6412
1058.21	938.075	1016.41	1.11769	79.5613	43.8031
706.367	1119.77	1124	0.926743	41.9789	36.4547
514.069	1172.06	1144.8	0.602094	93.5685	24.8676
867.249	827.34	1294.77	1.53322	81.489	25.2785
453.832	558.227	1065.71	0.528033	64.0619	18.96
1370.17	1201.56	1080.43	1.83738	18.4123	58.7177
935.66	1124.84	1073.52	1.90867	68.535	33.9186
538.627	609.533	1292.08	1.30982	57.2182	18.2761
833.771	616.188	1219.09	0.697214	24.3459	31.4831
1446.22	1224.5	1005.27	1.42125	38.4139	63.3486
1453.96	1168.85	1005.76	1.46133	34.1467	62.5269
1164.5	1322.96	1146.27	1.64499	10.6447	55.7514
614.086	988.077	1283.26	0.556451	57.0511	31.3589
1015.63	1331.56	1067.81	1.8155	81.9828	36.6268
1470.05	1256.13	1111.95	1.2318	68.4607	58.8926
1082.15	1035.38	1188.03	1.35351	42.2184	41.9148
972.034	480.117	1025.64	1.04624	29.8556	32.373
590.5	1094.47	1108.18	1.94972	73.4981	17.437
1255.51	1276.27	1336.33	1.09092	56.3355	45.4918
699.745	1459.11	1302.42	1.00848	18.2907	39.6741
1203.27	1241.69	1120.98	1.53612	38.0608	52.8305
1435.74	805.993	1281.88	1.20592	16.5811	47.455
1299.25	1435.35	1235.44	1.74295	16.3762	59.956
993.827	778.928	1306.13	1.00052	53.9438	36.8776
1142.64	1372.29	1037.07	1.97689	64.9403	49.281
969.118	475.8	1025.36	1.20744	92.2183	29.8273
775.364	1260.84	1319.68	1.3337	42.7313	36.1295
935.863	1406.7	1166.74	1.01082	83.9497	43.3839
949.429	603.519	1013.7	1.75118	48.2119	35.8582
1309.17	817.44	1188.89	1.69044	85.4476	38.4575
1446.62	588.324	1327.22	1.04278	52.9979	36.4745
611.609	896.942	1072.94	0.958651	10.04	36.3848
1478	1228.75	1154.1	0.635403	87.1815	56.0592
1233.97	1135.91	1264.93	1.05868	40.2907	48.4182
895.483	745.49	1062.5	1.81181	96.5895	32.8998
731.706	992.458	1110.47	0.647132	32.1334	37.6527
1106.33	786.81	1196.85	0.945155	87.1867	39.2612
894.608	1100.63	1010.93	0.790933	43.1734	43.3666
891.788	1492.3	1313.58	1.42357	85.6561	29.7849
752.572	504.455	1035.2	0.783144	15.4633	29.5868
1238.14	1044.47	1315.62	0.744629	14.619	36.8473
1135.67	1375.42	1338.43	1.72718	61.0867	40.0288
544.484	706.717	1109.55	1.16476	32.8102	23.3256
1230.97	771.622	1287.19	0.69662	95.6759	40.1061
1234.39	769.542	1153.82	1.2106	61.1754	44.5565
1286.43	901.227	1240.55	1.52382	50.2335	40.5373
782.481	1216.74	1291.02	1.96027	99.3275	19.453
465.846	1128.94	1159.88	0.992218	94.2895	18.2016
1490.64	1305.92	1086.53	1.61594	37.5379	65.1593
497.014	813.335	1323.78	1.44758	48.4292	18.5225
1444.07	578.715	1280.05	0.541012	90.2484	47.8321
1033.86	989.982	1138.51	1.03891	83.6101	41.3655
1320.42	1343.49	1057.49	1.17111	40.1127	61.2367
895.697	1416.58	998.003	1.73967	91.331	41.418
1032.8	914.661	1084.27	0.781418	77.1061	42.6386
610.039	862.324	1146.08	1.72785	48.1339	22.7388
513.287	998.404	1272.18	1.94921	54.0889	18.9413
1477.87	1133.13	1114.81	1.3991	91.2701	51.2429
718.889	731.291	1158.52	1.72799	38.7938	26.5178
1497.28	1292.99	1195.09	1.46982	92.856	54.6906
1184.7	671.933	1180.96	0.694765	86.3242	39.6354
580.513	1463.97	1151.97	0.785226	31.033	36.7515
1013.42	934.847	1167.27	1.90078	85.7946	31.0185
1107.22	845.487	1290.47	1.35627	12.5969	43.9348
1044.02	1204.17	1096.62	1.5257	18.7072	49.7754
1482.25	554.62	999.416	0.905308	33.7813	52.9033
1091.48	930.328	1296.19	1.4512	73.7459	33.7778
786.837	1168.01	1330.71	0.823261	62.0829	34.0332
795.111	641.778	1178.12	0.664606	34.1325	30.8272
1336.65	1077.8	1232.46	1.19779	66.9548	44.3765
1093.71	1171.64	1000.45	1.25126	81.4224	45.7003
1466.69	1427.14	1199.8	1.26637	56.6806	56.9896
1468.59	1227.42	1093.61	1.10928	50.9698	63.5618
1499.51	1234.22	1251.86	1.21519	99.9537	52.1649
1321.7	1072.53	1197.67	1.71263	91.4029	43.5918
767.612	1256.24	1173.98	1.51271	19.0126	39.806
1054.48	839.197	1043.17	1.85227	84.1659	34.2052
1062.71	1023.58	1072.84	1.18587	86.4195	40.5071
927.394	1393.08	1236.54	0.765552	40.0198	43.6951
534.68	1427.44	1115.51	1.80651	59.7437	29.5912
716.703	836.261	1234.56	1.61493	39.2185	22.9236
1416.07	860.952	997.542	1.57714	12.8208	60.614
1337.7	1301.41	1310.9	1.28235	16.3878	51.8281
771.98	1140.35	1184.33	0.665706	38.6186	38.5906
1083.38	1483.13	1336.68	1.84089	94.7058	32.4663
584.391	919.142	1152.75	1.26657	18.6565	28.3194
1107.49	1260.81	1083.46	1.0047	42.5509	50.3846
626.446	948.633	1291.46	1.94515	62.5243	23.2813
693.158	600.355	1203.51	1.1542	36.178	25.5167
613.536	1125.37	1171.55	1.83342	52.454	23.8908
624.364	1237.51	1097.94	1.14324	86.6813	29.6661
452.508	1432.47	1149.53	0.553739	56.5545	31.6362
1241.97	518.324	1078.99	1.71061	31.0228	43.0741
616.057	1214.77	1219.9	0.925704	49.3259	28.0019
856.742	655.603	1305.95	1.27427	90.1105	24.9757
963.338	1199.13	1201.39	1.34059	66.3616	39.9511
588.067	1451.38	1338.47	1.59184	20.2965	29.5494
1258.51	1170	1283.82	0.531385	11.3481	17.5517
468.411	1326.91	1056.8	1.10353	98.4258	25.2714
1123.63	1329.37	1076.17	1.63792	41.7631	51.5417
850.992	875.964	1028.06	1.30175	79.7802	35.1984
1007.23	895.299	1247.62	1.52226	56.5457	35.9343
903.838	1114.97	1317.22	0.931912	67.8865	33.8994
585.261	1278.75	1338.89	0.820451	70.5444	27.2445
819.617	523.914	1012.12	1.36637	75.6515	24.6458
489.785	709.513	1111.47	1.76478	87.6633	13.0841
599.329	1337.88	1097.92	0.574755	95.8058	35.0089
620.191	485.158	1282.76	0.59701	58.0345	22.972
1291.75	1407.36	1180.31	0.783479	22.8359	52.9359
1290.65	820.969	1336.26	1.93735	89.7363	35.6954
454.74	922.638	1184.33	1.47323	91.0373	11.5278
1081.55	904.417	1059.47	0.757448	71.6277	44.6487
707.15	708.156	1087.62	0.809624	78.001	28.2666
1258.57	900.642	1145.53	0.586847	33.854	48.7377
1122.82	591.401	1004.38	0.857479	20.5719	43.6599
1162.01	650.185	1233.08	1.28446	25.5686	38.7594
457.629	1494.11	1149.97	0.997153	79.2127	24.1034
1197.61	1049.58	1119.2	1.54262	63.7867	43.1176
963.645	824.447	1339.44	0.606521	78.5922	34.3957
1348.62	637.368	1073.83	1.45049	81.7368	42.2979
1432.58	632.32	1301.12	1.26523	36.3555	40.1986
929.851	1103.87	1082.7	1.88364	55.7757	37.6962
916.001	1084.92	1086.84	1.26264	74.1349	37.3865
648.1	916.974	1317.21	0.872474	46.5761	24.2361
1397.04	585.143	1099.06	0.704643	48.3576	48.138
644.309	908.796	1327.81	0.655791	28.1349	31.9738
1260.85	967.057	1269.75	1.59297	16.4903	48.9334
775.687	506.599	1204.53	1.87349	93.5183	21.005
1238.07	728.486	1177.09	1.28935	74.1053	37.0396
1058.18	1123.36	1195.18	0.921752	50.6915	45.7565
1266.08	533.914	1294.89	1.19841	48.7754	37.4297
1449.86	624.113	1068.68	1.99441	46.8514	48.3242
1220.3	838.356	1209.05	1.55545	77.6843	39.2165
1442.75	1058.41	1223.44	1.5807	63.861	46.0537
1280.32	873.168	1343.54	1.21243	13.5893	44.7934
1124.08	959.263	1213.2	1.80448	47.862	38.144
470.588	548.815	1073.71	1.65845	95.6768	12.738
1051.11	733.645	1181.88	1.88346	67.5382	30.6439
1397.24	1152.42	1324.57	1.39007	48.7012	51.5058
1347.87	1042.73	1217.71	1.13394	13.0273	49.2866
457.592	1462.29	1255.7	1.53888	53.1425	19.0608
1388.1	826.708	1292	0.624698	74.4509	46.4304
701.547	1022.14	1070.74	1.92726	74.3316	23.8404
747.296	876.022	1054.99	1.65746	91.0937	25.1745
901.485	821.053	1047.84	1.32843	37.9362	36.6569
685.199	1030.64	1021.17	0.719328	54.4065	39.9499
852.081	691.77	1255.73	1.37536	61.5197	28.9384
1021.57	550.571	1110.91	1.36322	24.2922	36.6576
1117.43	510.197	1092.67	0.64923	84.131	36.8417
1350.75	1292.88	1069.76	0.510076	46.3587	55.5493
924.971	953.542	1201.46	1.6264	17.0919	40.7484
489.168	879.509	1230.19	0.94476	74.0284	20.8776
1467.63	1047.33	1274.97	1.16882	94.9573	47.019
921.547	941.326	1317.27	1.06167	21.7517	34.2196
1247.64	873.353	1215.33	0.811847	34.5511	46.5676
1307.68	1292.15	1213.15	0.952117	95.2243	48.7402
1069.88	600.077	1075.76	1.72242	61.8454	36.1291
1143.96	1310.34	1115.35	1.08861	95.4985	49.0497
1169.57	1421.28	1085.49	1.40373	93.3543	46.7541
1184.73	1238.59	1213.2	1.30781	20.3232	53.0747
1126.34	636.054	1062.29	0.992166	89.04	42.0312
536.044	1086.8	1317.31	1.6018	55.0915	18.7484
735.407	928.869	1316.57	1.30281	52.6132	30.6016
460.954	961.49	1126.12	0.506167	46.6957	25.7485
850.01	901.306	1076.85	1.22556	13.3252	41.0555
786.027	1323.12	1202.09	0.725698	24.8819	40.4834
972.796	902.107	1106.25	0.530227	36.8821	39.6245
1153.07	1238.64	1257.03	1.12939	70.274	42.5036
728.857	870.69	1064.17	0.780396	99.1033	29.5462
1319.58	1271.68	1171.99	1.66932	95.3013	44.1919
564.885	548.504	1327.28	0.692564	67.343	19.952
1103.68	1301.78	1118.18	0.817612	76.2588	50.5166
1148.08	1419.84	1156.05	1.71252	25.1864	58.4947
1342.02	1243.96	1001.51	0.552667	79.6773	65.0666
538.318	916.381	1272.6	0.982858	70.129	20.4398
811.307	1174.38	1323.71	0.705162	88.4126	34.0365
855.305	846.864	1215.42	1.75406	63.2661	30.3138
1138.28	452.641	1244.14	0.906321	82.6767	32.7018
1407.42	689.054	1196.58	1.75493	19.1082	47.6971
1135.94	1467.04	1004.44	0.75079	47.3962	61.1999
759.044	930.075	1089.13	1.48705	66.1018	31.8071
530.484	916.87	1033.91	1.03964	43.0314	26.8224
1097.68	1109.26	1344.67	1.43985	11.7233	44.08
951.985	793.239	1142.32	1.82613	93.7985	29.671
1492.62	1204.93	1268.11	1.97268	46.0845	52.412
1335.33	873.271	1050.44	1.93735	57.5581	48.0418
1191.28	763.483	1159.2	1.75142	26.3396	42.4284
1261.81	528.048	1260.82	1.45805	67.1123	37.3295
659.409	677.573	1197.42	1.93202	53.3007	25.5006
669.013	894.553	1152.78	0.970085	99.9577	26.123
1026.36	1076.64	1321.3	1.69549	19.0132	41.1134
650.506	1123.88	1276.73	1.47452	68.2934	25.7061
734.636	1313.9	1184.85	1.78535	89.3938	24.6284
474.913	1365.35	1107.3	1.71364	28.5364	28.1131
1333	1005.95	1232.39	1.06138	17.9829	50.9929
697.427	744.208	1231.37	1.48363	91.948	15.3392
823.685	1119.53	1297.39	0.937343	87.5429	29.1293
1334.68	804.049	1280.8	1.22678	37.7621	43.9924
477.922	544.437	1280.86	1.18938	56.9261	12.788
1355.38	844.293	1272.14	1.10022	43.114	44.0089
834.235	499.816	1273.13	1.8718	85.7442	19.9966
1025.28	564.226	1079.1	0.915564	21.8383	35.7347
1421.83	1435.14	1019.84	0.901693	23.6263	66.2177
1435.36	605.582	1125.81	0.785011	63.2954	46.7488
1438.89	500.383	1039.72	1.79404	19.1756	49.5314
1218.97	769.22	1284.09	0.763084	86.1548	41.7725
919.328	549.892	1236.2	0.737851	21.4707	32.2642
1277.3	1212.95	1060.06	1.736	30.4425	56.6536
1073.18	1014.72	1238.75	1.3551	83.2677	36.4833
784.125	596.319	1221.34	1.55785	17.2132	29.8298
1191.54	715.04	1172.6	0.558933	56.3908	40.8085
885.273	1144.4	1088.37	1.84525	75.2258	33.6512
963.031	1270.19	1160.93	0.592547	37.9035	45.4403
1205.61	1201.85	1176.56	0.77583	26.9878	48.0897
661.758	805.686	1040.71	1.75031	65.9736	26.6375
753.486	1282.92	1306.6	1.37514	99.0918	27.5774
1254.63	649.963	1191.78	0.849474	22.9019	42.1849
707.251	1399.45	1255.81	1.50212	90.7855	25.1569
1229.11	499.105	1250.09	0.613136	67.392	36.0934
1113.58	723.547	1314.1	1.82061	66.0639	33.0488
628.513	987.115	1150.61	1.86098	54.948	22.3023
1220.99	623.018	1300.31	1.02744	26.4271	39.4226
1050.82	1305.82	1138.67	1.17467	38.2181	47.8152
757.228	1339.02	1226.99	1.37773	31.8601	38.3163
864.294	1444.05	1014.73	0.551143	14.5676	24.2619
813.469	820.83	1036.19	1.1531	54.7225	37.2945
1408.43	660.6	1091.75	0.797626	16.1454	42.8432
925.899	1340.95	1329.84	1.21057	13.5272	43.6388
1090.41	1263.32	1139.76	0.754068	83.7131	47.6033
1354.24	821.768	1175.51	1.15746	58.4639	45.0237
922.728	1497.17	1084.54	0.945103	82.7437	44.4324
1230.8	911.623	1033.06	0.672848	63.3574	53.4147
994.089	895.082	1277.23	0.900868	31.8387	37.9981
682.621	1036.02	1280.88	1.96838	30.1052	29.0451
1177.53	1420.53	1158.41	0.725457	76.8784	51.98
628.46	799.785	1339.09	1.54372	12.5676	26.1342
1051.19	952.896	1159.06	0.979207	90.6047	39.695
508.377	517.506	1269.03	0.9555	65.7701	18.4886
555.898	830.791	1057.28	1.04066	14.7815	30.8282
1003.57	812.34	1103.1	0.760912	76.9614	36.3113
493.216	1347.67	1305	1.95974	62.1269	20.0812
1259.43	1254.22	1080.12	0.677544	17.2082	40.1136
544.878	688.689	1133.17	1.87077	55.6396	15.475
940.612	1031.37	1126.97	1.70538	32.0615	45.7694
897.494	1389.03	1272.09	1.86641	37.5885	38.1345
751.594	1074.85	1212.89	1.28324	67.0689	27.006
1151.62	1314.48	1018.78	1.06018	47.048	55.2953
781.479	593.623	1178.98	1.48015	44.4886	27.4006
1263.12	1220.29	1166.95	0.971857	24.0815	55.2892
1424.74	697.583	1342.71	1.16051	92.3298	37.9153
1488.45	1115.19	1072.15	0.982829	59.1428	63.8985
807.776	462.171	1148.15	0.960768	44.8118	26.5275
610.435	1245.15	1282.16	0.681964	84.1229	26.6426
533.458	1322.87	1284.91	0.771789	83.7508	27.5742
608.142	795.755	1009.83	1.89735	39.9605	29.3709
1044.86	1203.14	1266.07	1.33217	14.4191	45.0412
819.753	1396.95	1313.03	0.982854	80.3443	31.7885
1197.1	822.785	1247.34	1.9332	69.7488	37.7964
866.295	793.398	1164	0.931041	22.0199	32.8586
1022.52	760.742	1207.9	1.0463	45.6071	34.6968
742.101	850.521	1023.16	1.99005	37.2932	33.9681
1377.38	1211.78	1314.67	1.87805	60.4789	45.3489
1302.69	586.301	1156.27	1.44229	14.2979	44.7634
874.214	1439.8	1141	1.48573	91.9539	36.2251
1480.27	912.587	1165.81	1.83064	36.4371	51.6443
1317.61	991.359	1333.64	1.34362	80.3437	38.2666
978.635	592.821	1228.12	1.38444	79.6823	31.1813
1203.37	635.172	1210.89	1.85406	19.7897	43.3412
1241.81	533.747	1185.14	0.77546	38.823	41.4728
1416.67	1052.66	1216.82	1.62381	85.4419	45.5674
791.894	1303.36	1117.24	1.80388	66.7134	37.8107
821.699	1293.02	1268.71	1.18203	64.9311	34.1087
1137	1030.62	1231.2	0.654129	59.5365	44.7629
1430.75	1289.42	1006.12	0.865173	54.9305	66.6534
1459.25	952.681	1330.35	1.69213	77.7359	45.5741
1407.17	453.537	1265.05	0.903632	78.4512	42.6213
759.286	1376.72	1183.27	1.23374	31.8682	40.1344
1155.67	656.571	1252.02	0.866001	16.0605	38.8109
452.135	579.413	1196.93	1.02313	97.5222	11.0602
1144.98	1072.24	1184.23	1.2463	58.4223	43.4243
864.274	1378.25	1051.22	1.42728	47.8739	42.8347
905.934	977.542	1278.97	0.522293	64.4649	35.0774
1029.57	1194.28	1030.46	0.859099	65.9847	52.618
1306.98	1461.05	1121.75	0.635162	65.8793	59.0413
1031.5	558.157	1304.88	0.886741	66.379	30.2274
742.772	1328.78	1060.49	1.69758	48.4301	38.0273
680.039	701.396	1049.37	0.625271	13.1572	28.5342
521.372	1152.97	1153.06	1.86321	97.7077	15.4634
1169.21	1064.57	1346.23	0.72308	44.6376	49.7919
1162.63	1110.03	1194.12	1.94586	92.7144	36.5467
569.482	1248.38	1080.51	0.604595	82.2194	33.7733
1431.19	655.421	1121.29	1.52294	98.7256	43.2745
612.299	1486.44	1251.55	0.889452	97.1975	31.081
815.731	660.352	1162.33	1.65955	25.7869	31.9279
775.086	859.435	1311.4	0.517173	98.3269	29.3487
1229.61	730.24	1174.58	1.90565	46.3143	38.1134
735.48	868.002	1087.79	1.79092	52.1653	29.3448
1361.94	1009.5	1279.46	1.14496	61.9029	49.489
680.534	581.317	1143.76	1.37692	31.3201	25.1425
814.818	1440.09	1006.34	1.79777	19.6154	50.8196
1249.25	1003.08	1078.67	0.661124	95.9429	50.8334
605.198	613.431	1214.93	1.46476	39.7196	23.5015
1263.74	1012.08	1291.14	1.20501	41.5196	44.0982
881.064	1026.15	1015.7	1.73876	35.1836	45.8539
1444.26	1058.54	1302.98	1.97944	18.9007	49.6179
1107.11	964.562	1035.25	0.858548	80.4589	45.3652
676.118	1277.08	1305.35	1.89214	64.7306	25.604
1499.11	1119.54	1106.31	0.648819	63.0996	61.2426
956.736	1363.88	1028.38	1.70717	76.4434	43.601
1365.73	1326.17	1045.13	1.57085	14.8403	64.4166
1227.16	903.188	1184.64	0.820626	65.4187	45.311
1129.28	622.499	1278.65	0.578295	92.7708	35.8965
607.805	542.104	1129.4	0.651259	36.0038	28.5111
726.735	1219.95	1070.25	1.93754	57.0166	33.3413
633.909	1256.65	1240.14	1.76656	11.6064	37.654
749.271	682.744	1197.64	0.836852	52.8848	27.3484
1414.25	1077.44	1153.24	1.87088	16.3119	59.0882
724.936	1175.04	1330.55	1.35479	15.3724	36.2339
1383.08	1250.98	1321.5	1.00255	15.4485	52.8161
597.843	469.083	1218.31	1.645	56.47	21.5065
1208.98	529.774	1034.24	1.70738	72.7138	37.5459
1044.52	868.16	1218.01	1.16403	83.9272	34.3115
1429.08	1103.27	1279.5	1.32671	30.6294	51.2366
1323.75	834.766	1220.95	0.548564	98.1639	45.7284
1097.28	1424.36	1002.71	0.987976	57.1121	56.0606
1421.56	1078.12	1084.81	1.37089	64.5865	54.9287
909.418	843.865	1182.48	0.517616	84.6265	36.1835
1341.46	1064.7	1038.81	0.65393	98.1035	54.9797
804.351	694.743	1160.61	0.775975	53.9238	33.5578
1222.98	1042.3	1121.61	1.57835	22.3949	49.6528
1355.15	1325.12	1148.4	1.82346	42.4403	55.9473
1247.37	1120.81	1220.75	0.817552	69.9759	47.5932
968.877	484.91	1174.25	1.50618	19.8782	34.4125
1261.23	725.355	1118	1.91957	51.5127	44.4458
1166.3	964.101	1004.65	1.45621	32.5913	50.3888
1281.3	1086.87	1069.56	1.84009	88.0735	46.0437
1295.72	1169.91	1088.1	1.90262	70.502	48.4381
596.255	1256.03	1095.48	0.627955	78.4794	32.4878
1145.56	587.977	1024.83	0.516885	83.1147	43.155
665.02	757.444	1329.76	0.850852	55.8984	25.4156
1372.25	1144.59	1222.65	1.14969	59.2594	51.9001
824.263	1339.12	1257.42	1.7666	98.4582	26.004
699.489	926.107	1082.14	0.767306	18.8014	35.6124
1499.3	812.534	1238.39	1.78285	94.6518	40.1208
1057.57	700.106	1216.77	1.81035	80.0512	29.833
1256.51	617.601	1157.07	0.724476	57.0367	44.0216
484.375	592.972	1317.71	0.969509	74.9335	17.2095
1310.89	1078.92	1157.44	1.38674	77.9574	45.991
614.498	853.611	1107.12	1.47256	41.8545	27.2405
1417.42	593.599	1104.48	1.91702	50.6092	44.9826
1062.37	468.251	1050.95	1.83535	42.9805	35.0634
994.442	816.035	1172.12	0.770635	60.7158	39.3934
559.116	1187.06	1039.56	1.92025	37.3952	26.2129
697.345	592.141	1201.08	1.48503	44.9209	23.6625
1050.62	867.035	1073.5	1.34179	76.8833	39.0968
513.896	1414.01	1346.55	1.90892	21.0106	25.9896
797.788	1133.66	1246.86	1.87327	75.2927	29.9346
747.975	654.582	1199.88	1.33635	60.0152	25.4838
534.156	1192	1067.11	1.35907	65.661	29.1709
1108.24	663.414	1236.36	1.39912	85.7344	30.8266
1106.77	718.717	1194.93	1.2467	81.5798	33.2511
914.231	813.134	1088.58	1.41588	11.865	41.4692
993.472	513.846	1256.67	1.51059	74.7487	24.0989
526.376	1297.83	1038.64	1.38119	68.3905	27.3018
561.511	1027.82	1301.37	0.549698	51.286	28.3438
742.993	958.893	1267.7	1.9667	71.7313	24.8501
884.542	723.503	1006.53	0.891207	65.3141	37.8554
738.484	1427	1031.96	0.749672	68.3336	42.8804
792.674	1258.45	1046.57	0.851415	72.2505	38.9672
554.137	1335.36	1314.7	1.20198	45.5026	30.7401
918.289	462.997	1300.62	1.13756	65.3608	24.4668
476.224	1448.41	1297.24	1.65422	62.6253	15.7812
472.129	586.605	1006.75	0.621563	80.2434	19.0934
1227.83	496.511	1273.77	0.842181	43.4908	39.8161
542.669	644.208	1239.45	1.82844	55.9075	15.5932
1083.64	608.904	1145.37	0.634068	18.6723	31.6643
472.452	1446.92	1178.7	1.90771	67.668	17.3079
1137.03	1315.92	1170.18	1.96907	41.9775	46.599
1091.09	880.693	1322.4	1.21448	48.7708	36.0042
1222.47	756.715	1099.12	0.559225	99.1401	46.5788
1192.43	798.72	1019.03	1.7836	85.7217	42.691
473.644	698.357	1133.27	1.35486	49.3921	21.0706
675.111	1296.88	1247.16	1.0436	20.6761	39.0981
967.005	1486.07	1076.83	1.66753	73.3195	43.8038
1307.33	1341.29	1255.67	0.603906	52.4486	49.5896
734.555	1481.77	1220.79	1.21035	77.479	36.2855
873.99	792.419	1316.27	1.12661	86.5197	27.8919
1168.76	868.262	1188.71	0.751237	17.8738	41.3434
1082.36	552.056	1263.62	1.1384	47.0556	35.8527
942.439	881.022	1182.47	1.59522	94.9731	32.3757
922.77	602.463	1307.64	1.19489	26.2269	32.1372
1292.89	1161.82	1258.52	0.902813	33.9721	52.6351
674.482	1454.58	1161.03	0.813571	31.9864	40.0485
1222.35	1448.09	1123.92	1.57526	37.4662	56.1102
521.019	1425.67	1205.14	0.794439	93.2121	24.6614
636.289	683.995	1147.12	1.10367	98.4495	19.6379
544.318	1185.8	1076.8	1.64504	43.6098	26.4719
1207.06	1264.31	1041.1	1.36548	18.6039	59.021
748.161	780.232	1054.89	1.78237	49.1957	31.3629
1189.95	1333.84	1312.89	1.03326	10.6725	49.2975
1422.49	902.007	1152.34	0.574476	58.9955	52.932
1097.53	937.532	1201.96	1.66258	28.5684	39.6691
1250.48	1369.22	1124.39	0.701008	31.371	57.5942
468.058	984.997	1102.54	1.01077	73.3554	21.3598
1102.13	679.032	1162.69	0.768737	51.663	38.4536
1395.74	576.199	1088.47	1.72485	45.9538	45.538
691.739	969.785	1280.2	0.532464	53.2027	28.9941
1306.25	869.863	1094.87	1.40175	79.1568	45.6739
961.716	787.903	1184.86	0.997921	38.3355	37.1884
976.78	1368.31	1017.63	1.77373	70.5957	43.8138
691.158	871.829	1177.36	0.923646	35.0626	32.455
1446.49	805.429	1081.63	0.54479	60.2943	53.6433
1313.44	1074.85	1258.66	1.47103	29.0415	49.7417
1070.05	1157.78	1053.11	1.60546	11.0597	53.8498
743.13	882.227	1151.68	0.601728	27.2858	34.1924
610.547	1414.28	1243.75	0.524952	35.0148	31.5317
518.209	641.975	1205.74	0.718786	70.2299	17.5369
606.619	1082.99	1121.41	1.05807	90.7275	25.8019
661.574	1008.85	1011.99	1.02134	43.3218	32.5596
678.075	1399.68	1088.55	1.61225	76.953	30.2192
1326.8	1156.77	1185.49	1.79457	46.7816	51.4687
450.033	1427.05	1025.05	1.28401	11.4226	38.5766
1061.52	1166.59	1231.86	0.960546	53.669	41.9562
460.311	976.115	1267.74	0.686012	87.7367	18.6006
1477.94	1256.97	1159.82	1.24115	24.4422	62.7364
580.427	1446.39	1251.42	1.04294	86.0145	25.188
663.178	1003.68	1208.66	0.562075	41.5319	32.1109
678.088	535.171	998.589	1.37106	67.9485	25.4656
634.827	952.509	1166.26	0.891388	64.2703	26.4747
1052.99	805.657	1121.81	0.918348	92.6454	36.9944
1086.74	1178.4	1175.1	0.535033	62.2287	45.8826
1045.32	1088.31	1062.68	1.11704	38.9945	46.0183
1423.9	738.604	1204.14	0.924614	37.6618	47.262
572.063	1012.69	1041.93	0.776048	79.4901	30.7137
1401.12	1062.28	1225.68	0.952551	50.6292	52.4992
1255.88	1462.74	1126.1	0.568021	88.0197	56.5752
605.995	1065.26	1299.4	0.88364	14.7852	30.2447
974.464	833.054	1342.77	1.05858	48.391	30.5871
1407.88	1061.3	1121.05	1.55495	85.3368	47.3848
1415.03	709.305	1092.4	1.87924	93.911	46.9563
854.402	845.185	1257	0.971269	13.8321	34.8516
1098.45	651.222	1246.03	1.29201	70.9489	34.845
879.369	1276.56	1154.61	1.01001	66.3588	40.3462
897.276	1257.92	1270.78	1.73479	70.4483	32.8413
1380.14	705.814	1187.9	1.04209	76.5129	45.4168
1250.68	1411.98	1252.39	1.80907	83.3983	40.9758
1191.32	776.047	1215.88	1.25429	81.1985	37.6834
986.438	1366.7	1130.73	1.30675	64.1964	47.3188
911.431	1455.6	998.325	1.01309	71.5401	47.4342
1341.83	1470.39	1242.84	1.0116	57.2361	54.9185
768.099	1152.05	1021.36	1.36079	31.2036	40.9504
1317.84	1225.05	1103.04	1.65714	31.3156	57.0923
455.296	1219.45	1148.07	0.916212	59.8587	26.4633
771.472	1179.28	1120.39	1.53078	28.3667	41.6456
747.317	1451.22	1253.47	0.929851	54.1422	38.944
737.033	1086.49	1331.69	1.45481	46.0908	28.9496
1088.84	512.287	1034.39	0.59164	96.7575	40.6661
1289.3	546.003	1318.78	0.929633	44.3112	40.1247
1118.58	978.461	1065.26	1.08535	42.439	44.9393
685.308	1247.84	1137.11	1.33854	48.6218	38.9946
1040.59	659.896	1128.45	1.06426	39.7274	41.7472
519	694.581	1229.21	1.88706	45.7754	17.2199
906.404	867.748	1116.85	1.51632	35.1382	37.94
1330.32	807.012	1075.44	0.653084	93.1898	52.0534
645.652	778.435	1301.25	1.53534	62.7933	20.3288
712.859	1205.29	1087.07	0.752774	78.7216	38.0364
1164.03	611.947	1128.7	0.992582	41.7642	43.0875
845.613	1263.46	1012.67	1.02805	69.7362	40.9825
1142.72	1129.69	1004.95	0.75376	84.0784	50.802
785.716	551.524	1138.6	1.63201	48.5482	27.8373
1212.46	1352.78	1196.27	1.41066	50.1149	51.2736
507.007	1027.21	1144.25	0.987215	25.7237	31.5042
928.49	773.241	1147.03	1.88271	20.5629	36.6057
1121.17	518.869	1226.63	1.33015	57.7722	32.7798
795.391	542.774	1088.52	0.688748	54.2783	26.325
1130.6	705.064	1207.18	1.76889	21.6042	37.6616
484.442	569.852	1192.99	1.33789	38.3223	18.4699
746.12	461.474	1003.8	1.67794	85.966	24.6515
1430.49	480.501	1111.42	1.69894	31.5097	46.3663
912.481	825.055	1112.68	1.44537	19.0982	39.1831
1468.73	1406.78	1049.22	0.759792	67.3048	66.5226
1197.17	836.516	1054.36	0.647068	54.8467	49.2972
1124.08	901.372	1235.1	1.16797	10.3756	42.7796
498.527	600.726	1099.01	1.00825	29.3891	25.6438
781.478	1284.3	1292.09	1.9453	19.3571	37.7678
867.454	1091.39	1237.62	1.01765	31.7016	36.3025
740.21	909.859	1102.13	1.61576	36.7178	29.8605
946.578	1175.65	1222.94	1.06612	87.2023	39.6999
1266.83	1135.45	1172.4	0.690474	69.1796	49.3417
1463.96	1483.2	1158.6	1.84295	36.9881	63.1145
637.957	1140.04	1097.17	1.4581	45.0631	31.1226
1041.9	1266.28	1238.61	1.83722	65.1496	37.5707
1057.47	604.45	1059.48	1.61237	87.2651	32.9608
1233.02	1341.37	1076.98	1.6633	25.6191	60.6537
1269.85	1292.41	1120.19	1.10758	29.5055	57.5935
649.005	852.723	1318.08	0.659081	93.3896	24.4026
1310.18	1238.65	1050.4	1.05174	55.1208	55.0054
1165.09	1261.07	1040.18	1.79538	89.074	45.4058
614.366	814.967	1238.93	1.77316	99.5894	16.9845
629.624	1402.89	1006.13	0.906567	16.7809	43.8303
1316.48	1102.3	1093.31	1.50557	98.5176	49.371
661.845	1139.47	1260.69	1.63578	41.0797	28.707
921.457	517.757	1325.97	1.20757	34.1331	29.3066
552.72	1029.56	1254.84	1.27699	87.3679	22.4398
1171.94	868.917	1160.43	1.57716	16.8421	43.4719
477.956	1449.34	1338.57	1.8055	14.2859	28.6767
1131.51	1085.85	1082.96	1.28467	20.5263	54.8156
1057.23	1306.8	1035.91	0.610619	54.8284	55.9127
1361.14	680.217	1222.88	1.9414	50.6048	42.3668
483.778	508.607	1028.17	0.867491	10.5969	25.1876
1465.32	667.816	1310.6	1.24212	84.9175	41.7345
694.786	624.425	1135.12	0.786186	18.0601	32.8962
653.923	609.943	1230.33	1.76863	33.7856	23.5519
1037.77	586.694	1077.94	1.86243	22.257	38.453
544.139	921.141	1337.99	0.92402	32.3748	25.6894
817.694	1443.88	1173.74	0.806575	52.8961	43.9495
812.895	572.487	1131.69	1.52666	19.2555	28.8273
580.719	1097.95	1335.84	1.51468	96.0826	17.9379
702.685	1341.73	1265.2	1.19722	96.0076	26.6876
473.819	909.09	1179.5	1.18135	10.7218	31.3789
843.983	1216.88	1045.68	0.794873	11.1001	36.0535
1324.5	628.569	1063.44	1.7149	47.2501	45.472
660.512	740.158	1233.34	1.95858	44.8279	22.9166
1329.1	864.805	1323.79	0.907701	21.0175	44.0648
895.297	1473.05	1102.98	1.35741	86.2537	41.8243
658.946	1463.04	1341.7	1.09696	31.341	39.0958
943.143	1382.66	1226.22	0.784066	57.5408	44.8632
1006.27	575.887	1267.21	1.46291	49.6561	29.9819
1370.82	1115.63	1197.96	0.657155	30.9067	48.9537
777.534	822.035	1130.54	1.7747	58.6279	24.0769
1324.97	732.26	1213.97	1.05765	71.2751	42.2657
1016.18	1489.89	1334.81	1.3008	67.3775	40.956
1165.7	1011.82	1208.57	0.870681	39.9665	48.9583
854.043	1314.19	1237.96	1.26861	12.0921	45.4749
1348.11	756.801	1173.55	0.615595	15.7465	29.8649
1451.36	829.915	1182.08	0.755654	79.4284	49.3859
477.889	681.56	1328.65	1.64803	97.97	12.5924
744.418	500.121	1182.21	0.726899	98.2614	23.5491
1356.17	666.033	1033.35	1.06601	47.2901	48.4886
1064.21	1002.46	1291.63	1.06246	73.5973	40.2308
724.733	1250.34	1219.34	0.964233	56.1993	36.865
940.683	1366.14	1322.6	1.53981	63.7526	35.8034
691.278	1433.24	1183.29	1.78703	39.346	33.3789
1486.57	1000.47	1155.55	1.0613	27.4087	53.5912
1031.18	799.273	1327.68	0.778692	43.6179	38.0465
1157.97	1387.56	1341.43	1.55641	57.4445	41.2285
703.083	490.291	1011.17	1.89164	95.0594	16.5498
1226.7	509.656	1289.86	0.581026	88.3835	39.6456
641.293	1380.98	1119.06	1.25392	81.0035	31.2083
811.672	1416.54	1226.46	0.879435	89.576	34.4996
973.689	1054.23	1238.63	0.641321	67.5998	38.0918
1243.35	1072.64	1016.82	0.874059	54.5431	56.9699
874.449	1496.51	1281.68	1.93807	60.758	32.2045
963.508	1390.4	1272.92	1.83986	60.8808	39.2418
1375.22	1029.18	1219.93	1.41753	17.6348	54.8042
814.418	1327.71	1077.25	1.02712	87.0198	39.8194
642.592	708.096	1259.01	1.02023	55.2164	24.5258
618.574	967.145	1032.42	0.673946	18.8168	33.8811
1368.16	970.54	1345.06	1.61183	63.4834	43.7847
1446.9	839.728	1149.56	0.591763	69.1165	51.4786
981.102	892.947	1310.33	1.43063	38.399	35.354
784.029	824.013	1191.18	1.77679	60.9385	28.0347
1348.69	1134.84	1022.64	1.28428	88.8749	54.415
961.601	1127.16	1165.03	0.61419	18.6045	31.18
1112.99	1256.45	1120.6	0.747213	55.3044	50.6542
1023.62	1384.02	1046.17	0.661619	25.9019	49.6641
1026.85	623.621	1131.41	1.56288	52.9408	33.1983
1194.03	1432.6	1315.01	1.10127	91.5226	47.9147
737.328	557.782	1086.32	1.17918	69.0995	24.6998
1170.02	1306.46	1139.83	1.86517	37.6115	49.8629
1362.87	1217.83	1223.61	0.946852	79.8327	52.8664
648.084	630.965	1194.19	1.6666	12.0268	28.0368
1270.24	1250.97	1218.6	1.40547	15.0849	54.6037
935.715	1377.69	1028.83	1.39155	19.2552	51.7089
892.577	1060.21	1052.72	0.97833	36.7977	44.5874
1106.72	1156.53	1257.56	0.870312	47.0064	47.8021
657.341	730.35	1239.5	1.61868	81.6118	20.1898
1153.87	920.949	1093.99	1.19868	25.2093	47.0872
1362.26	1004.68	1063.85	1.77017	76.3308	51.9215
490.188	904.248	1053.41	0.641139	56.3295	24.7372
1013.67	1235.34	1029.71	0.607148	34.286	46.1757
1151.16	753.553	1328.51	1.65098	28.2606	39.807
986.511	1295.37	1030.34	0.69334	94.1474	49.1883
825.961	1366.24	1277.25	0.644117	16.4979	29.3558
1016.9	722.699	1128.12	1.03361	46.6338	35.9651
1107.11	1117.98	1299.23	1.00296	85.1756	44.1204
1119.74	598.21	1005.95	0.85618	93.8012	40.064
979.505	495.187	1277	1.22617	56.1263	29.8596
583.663	1477.18	1237.46	1.28398	79.7417	25.6689
793.594	850.034	1330.29	1.75496	36.2787	28.9795
538.246	719.218	1205.92	0.910823	35.5863	25.0937
1262.76	610.333	1289.77	1.76208	59.3298	37.0019
840.612	802.617	1304.75	1.66664	80.1138	23.5452
1308.08	1034.43	1188.57	1.42594	62.9396	45.9668
1498.4	1186.91	1278.5	1.74903	65.4087	45.9911
844.823	1232.48	1118.25	0.899368	64.1197	39.2737
839.019	818.409	1186.72	0.784234	25.7803	36.4297
1135.51	1109.6	1178.93	1.77466	70.5865	42.113
626.558	1448.79	1305.56	1.90511	39.3027	29.7787
1354.41	646.195	1170.93	1.02321	16.5853	46.0193
1333.66	811.386	1239.6	1.71131	41.015	41.2559
532.66	640.712	1216.71	1.29665	27.9977	16.4406
546.166	1067.15	1096.24	1.19251	18.5333	35.4888
457.642	1303.41	1300.37	1.15441	70.3468	18.083
941.596	697.398	1131.52	0.973949	62.439	33.4828
1441.33	1059.64	1278.75	1.17602	69.615	48.9595
1330.07	1320.13	1214.79	1.68706	34.7686	51.1143
1407.7	681.041	1334.37	1.87386	24.9301	42.384
1138.61	815.199	1275.35	1.22177	88.6052	39.0764
1133.12	872.131	1326.4	1.48027	28.2207	40.8836
1060.37	711.849	1218.43	0.772501	63.6522	37.7924
955.403	1273.4	1018.4	1.34482	64.5422	42.0097
1484.14	681.157	1337.59	1.62967	35.064	48.6316
883.36	928.801	1244.44	1.2267	68.1657	28.8885
993.218	761.621	1144.38	1.73962	83.78	34.7637
1165.8	1497	1293.34	0.926539	45.5556	47.4601
930.916	1430.24	1019.92	0.50771	43.9843	51.4527
1385.68	1123.68	1244.45	0.814933	30.2484	56.3555
1049.43	795.557	1010.5	1.64354	74.4559	36.3786
755.337	1201.95	1166.61	1.05498	90.6892	32.6293
852.794	585.1	1082.77	1.90052	61.392	28.5021
1111.75	751.105	1090.3	1.449	91.3716	34.8263
1079.07	1230.42	1011.67	1.83158	82.8596	40.3913
801.878	793.891	1133.03	1.31921	45.4888	29.1366
676.598	998.481	1261.17	1.18349	39.2263	30.8366
516.206	956.262	1121	1.11949	78.0028	21.6958
1391.81	1247.37	1326.09	1.37898	48.7271	49.0854
1426.91	530.488	1022.39	1.88937	76.1832	46.0917
1024.54	842.791	1181.13	0.558707	26.366	35.8279
1407.61	661.147	1254.67	1.79165	64.0173	38.7833
889.468	759.605	1127.08	0.823924	90.4437	30.4726
621.527	820.376	1060.85	1.9	36.0146	28.133
762.232	1260.24	1335.43	1.01607	31.7422	35.4165
477.255	1086.95	1299.08	0.823126	40.1793	25.5542
1111.08	1215.66	1324.06	1.24339	82.7281	41.8311
914.926	637.995	1193.07	1.9976	39.4565	30.9555
1188.88	548.469	1304.08	0.736918	46.376	35.3619
887.086	961.345	1212.3	1.6393	56.7737	32.475
643.609	1096.02	1341.85	0.892312	64.9757	25.2219
852.49	1485.06	1226.93	1.31252	68.8334	40.7831
1432.06	954.196	1314.94	1.91494	56.0255	42.7631
548.266	1472.42	1166.83	1.22811	35.6032	34.0071
456.454	813.658	1179.48	1.33809	57.4274	18.6727
1303.68	663.795	1121.98	1.82674	35.3802	44.3628
951.104	1364.73	1331.73	0.676955	61.8697	38.5723
1215.38	868.144	1344.39	1.33639	32.1276	38.5673
815.878	470.843	1234.1	0.751391	92.6187	23.8681
1075.16	1117.08	1325.24	0.591164	67.2672	43.1168
557.316	1093.83	1246.05	1.21468	82.7793	20.7484
999.472	1471.81	1176.63	1.08848	75.8155	42.9403
1345.35	1289.15	1070.67	1.06306	78.1967	54.0017
1016.12	1203.73	1014.2	0.567783	35.113	47.3168
877.955	1117.23	1042.41	1.56888	65.0076	36.8149
1484.52	1212.93	1156.54	0.785073	17.8707	50.66
1449.32	825.079	1149.74	1.38878	85.944	45.785
753.78	753.017	1257.64	1.2052	80.6685	25.5721
1439.22	980.716	1285.79	1.15854	59.2263	47.1294
1485.04	1180.5	1147	1.6901	15.8012	61.2571
1093.9	917.68	1286.27	1.04366	54.1444	38.4015
907.915	1217.99	1126.43	0.721512	38.7619	44.0791
1487.01	898.343	1212.41	1.98439	87.8151	44.8017
1106.06	666.78	1126.14	1.88588	43.9441	35.4547
542.853	502.915	1314.33	1.37443	45.1943	15.9273
1049.95	1094.27	1312.71	1.89315	29.124	39.8594
620.729	1328.36	1180.36	1.70467	92.9329	18.6056
987.865	1356.25	1150.73	0.806029	17.9669	44.5707
647.938	970.018	1081.13	0.895514	41.7326	32.0039
1158.33	624.639	1155.1	1.74108	29.9008	38.5659
1222.09	1370.94	1331.67	1.11103	19.2363	51.3828
1231.81	1444.41	1057.22	1.67719	15.2574	61.4008
1483.51	965.834	1237.21	1.07497	13.2873	50.6213
555.873	1331	1024.23	0.853237	19.1844	42.0249
540.646	1021.19	1135.29	0.792356	57.6467	28.1072
966.364	1193.83	1247.03	1.87902	71.8276	35.5021
1375.12	969.022	1338.75	0.91228	65.0492	46.6273
1243.94	1191.9	1028.71	0.982198	96.413	53.9284
567.033	755.255	1010.3	1.4652	27.7645	26.5857
1023.05	526.721	1161.75	1.0988	53.4395	33.5078
571.153	732.658	1196.85	1.95435	26.1063	23.5455
1499.28	887.985	1282.55	0.614629	66.0154	49.427
455.453	1271.5	1278.74	1.03126	81.1959	17.4212
1021.65	992.874	1197.11	1.33788	30.4428	39.0563
1361.31	1053.16	1021.21	1.94164	61.5678	54.8828
939.599	667.623	1290.06	0.93368	81.8639	27.5288
947.72	1174.4	1124.08	1.1455	45.111	46.3958
516.909	999.465	1109.7	0.747147	61.2086	26.5806
919.019	1454.7	1069.8	0.669534	44.2502	49.6448
1078.34	1202.59	1218.28	1.76324	87.3585	37.4209
1040.14	1086.86	1170.96	1.97558	39.0863	39.7713
611.768	868.029	1139.64	0.654763	21.3532	31.3092
1113.08	1146.75	1306.31	1.06336	43.2804	43.1935
1219.94	919.837	1130.01	0.972433	36.7868	49.8311
1344.94	1431.14	1046.6	1.19164	97.7823	55.0062
901.648	1267.83	1161.28	1.49848	17.7799	47.5571
766.723	814.958	1307.9	1.39595	54.3206	27.215
1098.43	1083.35	1020.29	1.88644	25.6062	48.6672
1253.91	1436.39	1217.17	1.67416	21.0653	61.7078
1448.98	1268.34	1060.75	1.31098	71.283	60.0196
632.612	756.629	1090.65	1.49882	20.1757	34.4161
459.733	543.896	1288.45	1.1081	17.5267	22.5629
1243.94	900.358	1226.72	1.25502	66.0335	41.7594
644.37	546.919	1243.48	1.55539	37.6818	20.7341
1153.42	1348.71	1194.68	0.650754	42.3875	50.6733
1113.79	1242.64	1168.32	1.5296	89.0698	36.9081
627.966	1212.64	1008.57	1.84007	46.4624	30.9465
1409.53	635.187	1093.78	0.611101	22.0045	40.4324
1334.2	519.12	1315.14	1.54346	58.0734	39.4609
1156.05	993.145	1113.83	1.57317	36.4352	45.023
574.716	1236.91	1158.13	0.72346	49.2734	35.1373
638.188	1233.34	1018.27	1.45565	89.2237	25.6369
934.821	654.778	1288.62	1.99436	60.7158	25.2747
1261.08	949.518	1029.03	1.32195	80.4539	46.8006
1378	1267.2	1153.35	1.08599	17.8046	59.533
476.144	475.575	1074.68	0.979494	78.766	17.5108
1265.72	912.581	1079.83	1.33223	48.5629	50.7259
1441.1	1046.56	1249.59	1.51244	73.9476	48.502
1210.03	1410.59	1002.26	0.725076	11.7444	38.4859
583.886	613.925	1333.35	1.91435	20.1874	22.0315
1340.02	474.376	1196.31	1.38308	11.4824	46.4491
1072.36	1277.67	1042.76	1.86045	21.0163	52.6395
626.766	808.539	1023.62	1.4867	38.7298	30.5515
1407.41	547.174	1248.64	0.849677	61.4713	38.9138
1262.36	1107.49	1158.24	1.0195	51.7362	51.7287
1137.35	1121.42	1026.11	1.68567	61.6077	45.9485
672.985	1310.68	1070.19	1.92719	69.1591	28.5572
560.255	553.996	1182.78	1.73955	31.7574	22.3721
1064.83	875.666	1192.96	0.7817	68.6187	40.5131
781.427	1280.55	1202.34	1.8769	27.4262	39.5083
947.911	616.733	1125.35	0.67166	86.7913	36.5592
1206.81	1158.74	1286.52	1.54684	10.4309	50.5418
1210.87	1164.9	1239.75	1.35924	56.6251	47.7623
1178.5	1307.87	1198.65	1.16413	46.14	49.8185
724.927	1073.16	1202.78	0.601421	79.6677	33.6051
1022.82	948.997	1224.21	0.915749	62.4244	37.9941
1374.3	1107.21	1030.58	0.771254	21.8122	57.5664
561.613	1142.98	1245.1	1.67597	92.987	17.3843
748.122	628.765	1200.36	1.38845	15.7626	28.854
671.549	1405.1	1265.62	0.631349	11.4976	22.8744
1157.76	1177.17	1314.39	1.46415	49.8678	44.5295
795.639	922.16	1102.16	1.59037	13.8373	38.6071
1327.25	809.689	1179.97	1.22451	37.4478	45.4157
1242.69	915.714	1155.01	1.51616	58.5078	44.1096
1155.57	1027.96	1221.05	1.29933	62.9319	37.8675
653.151	730.831	1028.58	0.59815	92.4819	30.4312
1154.26	940.696	1292.31	0.892175	98.4354	37.4652
493.814	1220.62	1312.61	1.40083	27.4092	25.3019
848.298	1084.45	1062.35	0.658517	88.7642	41.939
757.372	1096.85	1105.72	1.06231	84.0689	29.9729
955.903	1343.16	1260.12	1.58383	42.0503	44.8258
570.454	1042.2	1341.59	0.832121	17.8125	28.0061
776.724	1165.43	1233.89	0.624105	34.3607	36.4526
1088.5	1239.72	1145.3	0.839209	17.0483	48.4792
959.997	625.64	1013.94	1.56652	82.5509	33.6385
1373.21	1220.94	1305.66	1.68277	87.7501	48.1
1066.18	940.992	1252.78	1.86326	38.6989	37.5262
929.617	991.088	1331.61	1.87586	49.5932	30.9972
637.409	1218.33	1085.68	0.79941	26.2969	35.8899
1179.54	866.068	1039.81	1.25876	53.6502	45.7587
760.166	504.747	1157.51	1.37951	41.961	24.2004
1343.8	1276.61	1309.93	1.30997	35.622	51.1496
1312.43	908.104	1115.67	1.57222	12.3506	49.7873
1200.61	1034.15	1344.08	0.790342	77.2848	45.4254
637.092	802.125	1337.96	0.532222	54.7406	23.7296
584.268	1295.99	1316.36	1.87565	16.7377	25.8863
682.002	1176.68	1069.01	0.51133	63.7254	36.4045
1327.55	721.444	1047.49	1.54029	71.7632	43.7975
927.669	936.074	1234.77	0.894326	58.6831	34.0207
464.327	1136.46	1327.54	1.88781	75.8872	13.8586
1401.58	1269.05	1241.83	1.59659	99.384	45.4585
1352.18	652.389	1318.43	1.98163	47.9906	38.3586
636.889	581.569	1093.27	0.701565	51.4345	27.5305
1248.59	818.58	1028.28	1.22144	74.9663	46.75
609.839	1463.71	1015.35	1.7755	31.8995	40.4511
510.293	1162.75	1039.14	0.760711	66.731	28.2193
636.429	761.201	1286.31	1.80233	26.1064	23.5592
658.578	724.259	1179.11	1.02059	38.4604	28.7793
1393.02	884.234	1275.93	1.11109	33.7453	43.5429
1125.18	1425.9	1336.7	1.40809	81.2565	37.5227
729.343	1354.66	1190.26	1.8819	92.9113	25.3806
850.531	1254.29	1044.89	1.21137	25.3181	46.1033
1089.46	1397.76	1229.2	0.516311	28.7666	37.695
610.211	531.463	1005.4	1.14654	53.1921	25.6409
831.015	955.467	1100.92	0.659908	36.5368	37.2343
1200.91	934.266	1339.65	1.84969	25.7	42.5628
969.534	534.164	1238.03	0.985898	82.504	31.453
1368.31	885.354	1055.45	1.47621	53.1904	51.3223
1144.09	631.46	1338.05	1.69937	60.8206	29.8671
938.995	595.54	1054.09	0.989208	38.4678	37.9757
1492.67	643.888	1269.2	0.550658	65.4744	47.733
825.591	1000.25	1014.48	1.31293	85.2258	35.3236
1363.6	1072.77	1115.58	1.83204	86.8979	47.5395
837.995	588.973	1182.31	0.830054	98.938	21.1433
825.901	474.735	1013.55	1.94525	19.7203	33.037
1367.49	1376.89	1135.5	1.31795	60.636	60.2371
830.766	545.485	1166.9	1.72579	48.3505	27.3182
1180.55	1439	1239.98	1.05579	45.1703	52.5225
1030.26	1254.35	1260.68	0.822243	56.9122	45.7598
524.771	739.713	1310.16	1.21079	53.182	19.6466
532.519	1051.96	1111.82	0.5289	13.6178	22.0202
975.683	1168.99	1030.09	0.981986	12.4556	47.2304
703.626	1222.25	1053.07	0.859036	79.5571	34.7682
717.251	1137.83	1315.38	1.34055	57.5124	26.2816
646.088	1169.24	1338.68	1.66209	67.9367	20.0677
906.808	551.441	1276.86	0.67799	79.7812	26.0408
1162.41	476.627	1139.58	0.929474	43.5362	35.9499
1333.62	1268.47	1285.1	1.14704	40.419	55.9587
1478.4	1061.8	1125.71	0.679686	39.2219	58.8516
494.605	456.944	1065.12	1.80136	36.5408	16.5455
1453.55	671.346	1183.61	1.50036	82.2395	42.3062
1286.32	695.433	1058.2	0.67108	27.1002	46.7111
1294.69	1200.85	1316.41	1.3758	71.5643	42.9468
846.935	773.749	1088.69	1.752	93.5145	26.9439
995.717	1027.52	1250.95	1.4317	81.3999	35.1192
591.483	1326.91	1240.14	0.633816	45.4108	34.1519
1088.92	969.135	1013.74	1.99842	46.9569	44.7073
584.878	756.846	1033.46	1.4331	15.0799	32.356
526.628	982.865	1169.25	0.696284	14.5004	26.6064
1408.43	1152.16	1032.91	0.91326	25.2117	62.7839
1438.98	1464.46	1117.31	1.4153	78.5696	57.327
568.224	1186.33	1316.56	0.788143	71.3595	26.1646
1230.69	925.137	1269.52	1.48694	85.0229	37.2888
764.808	1370.44	999.216	1.76691	43.1519	40.43
771.291	1263.76	1312.74	1.85104	97.3337	22.6292
829.206	960.903	1133.83	1.24989	36.514	37.9369
483.785	696.408	1151.37	0.613605	85.2652	20.963
1025.82	512.14	1305.12	1.9439	56.6217	28.5806
1448.12	1194.48	1317.45	0.592498	43.867	48.483
1322.08	1413.72	1282.74	1.92002	82.5438	41.4404
809.834	885.743	1254.42	1.49815	82.9718	26.5163
1143.9	899.596	1277.4	1.56897	33.5372	42.0337
1116.73	599.738	1300.69	1.53667	52.8995	32.7708
1027.51	943.351	1257.34	1.54702	55.7531	38.305
1121.13	579.45	1060.95	1.22557	65.9169	39.7471
1425.44	1396.26	1156.68	1.92793	72.688	57.7807
1234.82	1437.93	1326.55	1.13576	27.9281	52.4995
581.847	1195.38	1076.78	1.99709	86.4871	17.9645
1116.93	1407.7	1016.99	0.807448	73.9418	54.7825
798.613	473.913	1154.57	0.713591	31.7632	28.0025
453.133	1186.78	1065.64	1.45353	60.0353	23.3277
544.187	1358.81	1152.01	0.862716	79.1033	24.578
1047.27	1228.97	1138.28	1.994	73.9698	40.8868
1386.98	1182.19	1082.97	1.43994	15.1424	61.1631
754.92	766.112	1338.57	1.37766	34.9197	26.7276
1180.93	1399.05	1340.59	1.76896	23.1636	47.115
1422.65	529.219	1303.78	1.9261	89.6536	35.4391
621.578	621.309	1071.76	1.84202	98.8787	17.5787
783.527	1316.17	1082.37	1.936	93.0378	28.5397
685.421	1004.43	1271.21	1.05565	45.5089	30.4343
757.778	576.187	1162.21	1.13599	63.4876	24.4219
1270.47	926.796	1167.24	1.41738	82.1086	40.69
1059.04	1336.08	1253.07	1.45558	74.3675	41.0711
935.565	994.778	1204.47	1.45871	74.2094	33.2515
1406.79	1476.41	1080.34	1.94973	61.1994	58.2657
720.652	508.748	1033.46	0.508773	88.9453	30.0597
1186.49	1021.11	1147.14	0.945786	44.2985	46.6107
1160.61	1471.71	1171.22	1.84786	29.1564	51.701
624.489	866.034	1034.69	1.29735	85.267	27.3066
1321.92	468.943	1233.29	1.25813	42.7669	36.1578
1212.22	669.619	1015.53	1.81585	18.1211	44.7269
983.081	477.357	1069.19	1.40876	64.5269	33.0686
753.741	1063.02	1322.28	1.65571	27.7971	32.3079
1179.09	656.331	1211.91	0.894659	91.6544	37.2794
1198.05	614.391	1345.83	0.966923	30.4722	37.8337
752.841	1002.49	1177.26	1.60585	58.4253	29.1837
480.414	1407.42	1044.77	1.37322	24.607	34.5176
522.15	898.636	1129.07	1.67316	30.5803	27.8097
661.232	1201.59	1025.43	1.51222	70.7771	29.9969
540.503	784.784	1076.48	1.71227	24.9429	25.7648
1315.99	667.116	1264.74	1.38293	75.8061	41.8499
824.996	498.862	1117.56	1.19211	84.6244	25.6751
1076.21	1325.74	1341.39	0.623845	60.8361	49.8303
1470.87	651.318	1299.7	1.47629	56.5156	42.2803
585.189	730.917	1320.45	1.70076	76.5925	18.604
1397.69	1079.21	1195.94	0.727975	93.6866	48.3767
1096.03	683.245	1177.16	1.41395	16.4126	41.1368
983.604	1206.2	1231.4	1.11874	48.5908	38.8467
821.665	683.216	1147.75	1.70847	47.2256	30.3632
1049.59	748.716	1318.56	1.97309	73.7238	26.347
1227.79	460.146	998.353	1.00869	15.8508	45.3745
807.664	1074.67	1008.82	1.6771	65.5555	34.3957
532.887	658.557	1063.74	1.26617	38.0224	21.2223
868.15	1188.58	1033.82	1.52657	53.6832	37.4697
1029.92	877.697	1287.15	1.97992	79.3977	28.4608
478.947	573.762	1203.26	0.655956	25.8168	25.1542
701.848	1226.73	1309.02	1.91404	41.2557	28.0254
767.952	1209.22	1334.05	1.71541	69.2288	28.0943
476.199	1190.16	1313.42	1.18313	37.3138	24.2324
606.162	595.759	1103.89	1.28429	42.33	25.409
522.159	997.52	1227.44	1.87054	63.919	13.7904
1190.99	587.492	1334.53	0.53333	16.1174	20.5088
1351.05	1277.14	1148.86	1.71619	61.2394	53.4953
452.519	1256.1	1071.45	1.97488	89.7427	12.7381
1061.98	713.964	1213.51	1.70994	72.244	31.8439
1315.98	764.943	1202.59	0.543273	33.3734	39.2459
679.004	780.634	1328.49	1.14659	48.8084	26.9932
999.854	1397.49	1138.78	1.30739	88.9609	42.1007
597.095	962.504	1274.68	1.37801	37.5885	25.8856
649.519	969.033	1226.72	1.50715	53.3472	26.7615
1278.67	533.289	1186.49	1.16936	99.4911	37.8758
1007.15	670.555	1035.81	1.06716	98.0561	35.6206
1158.28	502.319	1009.11	1.3898	25.2842	45.2986
1062.21	1473.61	1042.29	1.41702	55.3164	52.0509
721.795	459.077	1305.11	0.571103	47.324	24.7136
716.219	918.92	1242.17	1.34773	55.2354	26.0446
486.224	1349.79	1091.31	1.0708	70.5018	26.7876
862.984	517.378	1012.15	1.17444	95.0945	31.8029
861.357	1446.82	1161.56	1.9746	52.03	36.5731
1137.02	1308.37	1175.89	0.515136	98.9343	48.0771
1410.74	991.328	1319.66	1.81069	45.855	47.5243
458.762	889.335	1082.16	1.72136	76.3597	15.4132
1102.25	656.415	1094.91	1.07828	61.2971	39.025
749.089	596.724	1087.47	0.535902	10.3233	17.1227
1014.4	865.764	1006.84	1.06489	81.6928	40.876
997.395	1175.37	1011.46	1.88133	52.0239	45.8591
1072.65	513.729	1207.44	1.05038	52.6947	32.0565
1103.45	992.234	1293.31	1.25399	49.437	37.7681
1416.08	514.493	1230.39	1.87914	66.6062	38.8724
1283.84	1291.12	1283.46	0.912688	33.1386	49.7177
880.174	798.89	1191.88	1.16942	10.2594	33.9931
1326.01	1190.36	1079.72	0.739886	93.9772	59.1788
819.243	670.193	1312.87	1.91024	83.4608	22.6323
1432.16	1369.39	1006.63	0.966759	62.9292	66.054
761.81	927.83	1264.48	1.53145	12.0286	37.116
1266.69	693.436	1214.18	1.43262	91.9591	34.9566
1406.89	1084.59	1066.58	1.09217	76.2232	54.4463
789.299	502.101	1207.37	0.583093	22.1712	27.8833
1350.66	1294.8	1048.73	1.4581	34.8767	62.9484
1134.62	1389	1182.95	0.895809	53.5191	52.808
492.338	1181.61	1022.87	1.94608	82.7943	12.654
853.257	1181.62	1292.04	1.04617	73.7742	31.7854
1135.9	829.723	1135.15	1.09691	94.0768	39.8947
1114.3	682.7	1074.27	0.561688	81.1714	41.3183
966.847	1471.63	1113.51	1.28209	53.7357	52.4601
814.837	1449.21	1217.09	0.878247	38.7356	45.3376
1099.58	1037.95	1242	1.24203	15.6919	47.0559
700.588	1470.54	1209.31	1.45809	97.0943	24.2856
501.092	989.324	1158.05	1.66178	92.7818	14.9347
1070.19	1470.79	1022.23	1.40261	37.2536	56.8409
1130.86	619.148	1286.01	1.99367	66.473	33.1169
1308.38	496.961	1026.61	1.84405	42.9847	44.7899
582.798	1435.93	1178.17	1.33982	18.6121	39.5411
626.807	944.788	1054.81	1.11329	77.455	25.6713
1119.7	969.861	1342.59	0.842183	25.5829	44.7409
762.2	917.175	1308.14	1.70533	84.0784	19.4745
1272.23	1276.46	1111.38	1.8716	38.5244	52.5513
799.297	507.735	1036.25	1.71837	82.8278	25.4681
740.767	971.371	1316.7	1.13264	29.0335	31.6332
642.916	1364.98	1305.13	1.24869	65.9934	25.5739
699.325	478.566	1304.53	0.907944	18.7967	23.1293
585.473	1189.19	1015	0.520487	41.8729	34.1926
1018.5	1111.25	1187.95	0.869531	86.7331	41.6856
779.027	675.777	1032.67	1.70925	28.2575	34.8951
706.784	609.646	1292.99	1.71645	96.9343	17.2784
802.191	1172.19	1087.18	0.824852	17.7212	40.852
702.337	714.067	1074.2	0.765624	41.6749	28.58
1490.73	1319.85	1271.2	0.830119	47.2196	60.4232
977.3	1429.01	1145.83	0.799903	49.7132	54.1974
953.852	585.149	1335.82	0.648782	89.0384	25.7031
691.6	541.163	1201.95	0.558529	71.555	22.9777
1139.22	475.479	1179.4	1.62831	44.5734	33.0284
682.584	738.739	1302.01	1.27632	36.2059	24.4368
1417	787.155	1121.77	1.83868	96.8322	43.1752
552.754	575.452	1324.71	1.67704	70.3368	17.7097
867.713	655.68	1242.77	0.921329	11.314	33.3145
631.904	1402.81	1129.56	1.6724	91.146	25.0465
684.757	1318.14	1140.16	0.640082	57.7463	37.3713
462.846	1196.31	1290.78	0.727292	41.1695	24.4942
1006.82	1372.48	1277.26	0.957869	12.5041	40.2228
905.667	1419.2	1233.59	0.615972	37.2078	46.8764
1265.11	1468.26	1015.82	1.99291	22.2185	63.8578
1178.4	1389.78	1252.97	0.873163	12.8086	40.7551
779.412	703.161	1113.28	1.57205	37.1542	29.804
915.453	786.443	1264.07	1.27787	47.3316	33.8559
480.15	1262.74	1238.18	1.92613	40.5597	19.0186
1485.59	924.343	1319.98	1.13188	95.7907	47.5914
996.446	629.722	1037.41	1.48247	81.3364	33.5866
1110.02	462.805	1089.93	1.17379	28.6015	37.5859
1229.41	614.056	1042.41	1.37066	26.4497	46.4649
999.292	495.015	1110.31	1.84443	38.6477	32.7844
1013.09	1192.24	1037.24	1.84056	57.9527	42.5682
1035.14	1167.46	1171.64	1.78033	49.3576	40.581
792.241	1268.93	1050.42	1.78317	17.4971	43.2976
1087.82	1232.73	1035.8	0.972673	57.1181	53.0683
1434.8	832.826	1132.99	1.77492	50.9436	47.4635
1143.97	652.218	1121.73	1.20364	35.9242	39.1522
980.283	1043.14	1033.34	1.0789	43.5434	46.1105
767.311	717.512	1286.33	1.88374	35.2953	28.7525
622.468	460.107	1287.92	1.49146	34.2652	19.6245
1381.12	904.988	1084.97	1.55149	40.3422	50.8375
984.012	864.796	1015.92	1.69902	41.3165	41.5881
555.574	1086.12	1200.76	0.515621	55.7078	34.3662
1480.01	473.599	1045.54	1.81231	66.4542	42.2068
1186.24	844.09	1075.12	0.835637	31.5642	49.5552
849.358	882.197	1245.96	1.22837	81.8252	29.1459
1385.91	647.051	1277.72	1.80838	28.469	45.2303
1454.18	1064.58	1321.15	1.97936	55.0436	47.6963
478.894	974.299	1239.59	1.36049	26.6922	24.0779
912.344	1454.77	1330.08	1.3488	94.4963	29.3826
916.958	754.548	1006.89	0.535242	43.3313	41.8909
902.318	1243.43	1227.97	1.25175	17.9402	42.4593
1065.81	1174.57	1093.97	1.26569	57.9626	44.1184
507.923	698.327	1312.75	1.57875	60.5066	17.7475
570.923	952.156	1053.92	1.79389	55.8288	22.3333
1350.63	859.03	1093.8	1.34078	96.1006	48.0837
798.39	1316.4	1312.81	1.34968	90.3988	29.1266
786.829	1006.46	1243.21	0.853572	16.3213	35.9682
1188.63	883.201	1209.03	1.68933	64.5311	39.4586
1238.63	915.084	1029.86	0.742858	31.0498	49.2061
597.272	1411.71	1111.67	1.03787	45.6246	32.3262
796.154	1013.72	1129.27	1.70217	81.5065	28.6615
616.699	869.126	1132.45	0.623242	35.253	32.3766
1320.95	699.228	1088.39	1.96394	91.8797	39.8862
1410.78	1272.6	1233.19	0.518262	36.3624	41.7233
545.781	1372.31	1054.37	1.38162	97.3636	23.4806
913.285	520.485	1043.26	1.98233	61.8064	28.8147
1402.2	892.682	1134.31	0.95768	34.1081	51.7148
829.141	1116.93	1158.6	0.73136	10.637	30.6747
1301.7	689.215	1093.31	0.906479	84.9402	41.0424
1440.87	1319.11	1271.55	0.705686	17.3271	40.8468
1255.26	1264.11	1014.44	0.992975	37.2517	61.4348
1457.99	1288.41	1223.63	1.75639	61.593	54.0902
528.522	596.858	1041.87	1.98084	25.7685	20.4898
1457.25	580.022	1036.55	0.882088	79.5613	49.4795
965.218	638.139	1003.35	1.96353	51.8448	38.709
1244.18	587.129	1314.18	1.55915	70.0627	35.3536
525.175	921.57	1108.67	1.13257	69.9035	23.1057
1419.06	585.522	1219.4	1.79054	34.1747	44.5451
643.414	1220.89	1058.04	1.51366	46.7772	33.5659
615.599	1224.06	1090.14	1.46544	83.4075	30.2151
500.2	678.497	1076.73	0.587153	84.3407	24.4677
1395.44	1230.11	1322.04	1.70224	44.5992	49.0996
687.778	883.052	1143.8	0.96072	84.4802	27.8569
1090.99	1145.03	1021.75	0.838731	13.3792	44.712
1261.67	1286.33	1054.07	1.81058	42.5525	57.5759
628.42	1209.3	1022.22	0.753128	99.3151	30.5288
1284.54	944.826	1174.48	1.85321	18.2862	46.7196
1353.57	1046.54	1081.39	1.05817	28.6095	60.2456
723.649	1167.34	997.517	1.06206	45.7929	44.5548
1263.07	1310.13	1342.37	1.22721	83.4498	44.7604
1003.56	947.76	1224.68	1.55963	28.1366	39.9175
491.109	1368.39	1058.88	1.88016	53.892	25.5209
871.449	973.142	1308.28	1.26887	65.5382	29.381
835.025	569.115	1103.19	0.703028	89.9878	29.9263
941.459	549.39	1116	0.603669	65.3131	34.0422
603.117	648.312	1154.62	0.75329	20.0497	28.5001
934.992	773.926	1318.88	1.77043	52.393	25.8858
596.301	1343.87	1051.03	0.859555	20.8909	39.3658
1264.28	1346.89	1201.76	1.94299	55.1755	49.7021
543.781	1278.65	1299.03	1.93029	85.1129	13.0655
968.409	666.337	1063	1.14649	89.3367	31.3792
554.936	1415.47	1228.19	1.73721	79.9414	23.3462
661.825	686.05	1300.19	0.863656	31.5355	26.364
780.152	980.579	1268.18	1.83813	35.1636	29.3636
983.634	1029.64	1130.31	1.95387	26.0325	38.7814
1299.64	730.255	1224.05	1.80702	67.408	40.1427
678.596	1215.43	1202.99	0.807611	70.6646	34.1935
1014.15	769.581	1080.76	0.704001	31.0871	41.4342
597.995	1234.36	1156.68	1.84876	49.332	24.5657
723.115	933.743	1214.92	0.524116	99.3214	30.7637
883.189	1044.52	1111.43	1.22645	97.8394	31.7831
1147.09	1400.67	1327.11	0.915588	45.0308	46.9419
764.587	1333.62	1026.1	1.18661	92.7685	36.121
1430.69	582.524	1165.73	1.40805	29.034	44.5685
910.831	720.983	1345.28	1.35898	98.0319	25.3723
516.713	1455.19	1069.09	1.66778	17.7159	38.2544
890.433	640.065	1086.01	1.39235	66.0712	29.0056
1006.21	1265.93	1193.1	0.956779	32.8946	44.7366
917.072	1277.82	1293.47	1.05828	58.1426	41.7877
1439.55	972.837	1331.17	1.49497	17.5155	49.1238
1212.45	1210.26	1127.9	1.68558	45.3714	48.3533
1425.66	783.471	1186.71	1.59943	74.195	44.5095
1279.59	925.954	1149.35	0.644673	69.0149	50.4632
1450.73	497.083	1206.34	1.13291	65.27	41.9284
1465.49	467.856	1202.03	1.7384	83.0655	40.3402
1023.14	535.673	1273.73	1.82863	83.3977	25.7483
1143.14	522.387	1135.39	1.7558	66.3442	31.9953
1077.86	706.204	1080.9	1.88001	45.722	40.7088
1276.89	766.645	1029.9	1.13898	29.2498	55.8687
483.656	1004.8	1278.47	1.96378	92.7041	13.7763
497.277	636.177	1097.3	0.506001	44.8497	24.5123
921.852	905.638	1052.04	1.90522	84.8526	35.412
850.268	581.514	1160.01	0.928988	83.0637	28.8107
1485.59	696.628	1036.54	1.78915	11.484	55.5232
455.969	812.514	1348.17	1.47549	97.6581	11.4274
1399.26	918.914	1156.66	1.66322	35.3268	50.5953
892.19	532.777	1342.62	1.22204	23.2718	27.0689
599.221	1199.45	1097.26	1.11272	61.0445	28.9239
1274.07	1370.88	1260.2	0.785733	43.4033	55.7967
1176.95	1411.84	1215.91	1.41261	60.5138	44.3028
1063.19	832.413	1335.19	1.26905	46.369	36.8512
1306.23	1055.65	1237.92	1.04986	72.1547	43.384
582.907	1285.56	1169.4	1.96408	44.0829	22.6302
1225.28	936.5	1277.74	1.09267	72.5444	37.5083
1353.24	670.883	1326.28	0.5824	85.1127	45.6615
1244.15	871.51	1282.83	1.26947	35.6218	43.1061
1326.99	1383.52	1266.45	0.814741	65.2515	54.2246
1245.65	798.576	1242.76	0.963373	15.9193	46.5977
1133.81	1040.26	1242.63	1.11865	51.6871	44.9567
1250.01	564.968	999.704	1.53892	76.2445	38.4888
878.867	511.639	1106.84	1.27149	14.8528	35.1334
486.254	685.994	1139.82	0.774357	20.4547	25.1818
1052.96	1205.83	1148.07	0.509733	53.4198	45.7671
452.057	1130.62	1120.54	1.48068	27.205	27.0336
1138	568.267	1345.15	1.66615	96.1396	30.9037
918.422	1152.77	1112.62	1.74175	86.5218	31.7621
468.265	715.367	1315.11	1.54612	60.7057	15.1259
1436.28	1388.59	1149.65	1.39309	34.6457	61.7391
682.612	1389.43	1153.12	1.88806	97.4579	19.1851
1343.53	1429.5	1214.08	1.90168	52.1607	50.3294
633.308	850.077	1022.16	1.02984	22.7532	34.3736
653.34	874.099	1206.86	1.37612	89.1465	24.0928
1054.11	1317	1242.67	0.544216	76.9106	48.813
738.304	570.617	1291.34	0.866286	71.9168	24.8199
1298.41	1425.17	1201.28	1.44676	52.3136	51.7394
903.372	1056.46	1128.85	1.86183	63.8132	37.4597
601.955	998.125	1152.94	1.1983	39.3287	29.803
934.241	919.214	1127.3	1.50257	19.0582	39.3381
1206.3	768.381	1211.24	0.814324	51.8005	42.4796
897.013	1471.58	1038.83	1.28402	27.4154	53.8989
1493.26	1322.66	1041.59	0.538027	68.4097	65.4202
1091.56	738.065	1103.01	1.51132	75.5394	38.1547
1247.17	923.274	1092.8	1.9768	49.877	47.4273
840.105	643.381	1211.09	1.68498	29.3703	30.5957
1319.12	534.854	1144.29	1.67736	76.6605	36.5772
1179.44	838.204	1187.76	1.43408	78.1628	38.583
1434.97	594.722	1141.31	1.41272	60.8956	44.7122
749.553	619.439	1038.04	1.04611	30.0918	35.6758
940.78	1142.89	1279.1	1.683	72.5869	28.8554
1383.16	795.915	1095.86	1.52466	98.2418	43.7842
1123.28	1363.28	1242.22	1.57828	84.2949	39.258
575.193	1088.08	1110.23	1.62927	97.1904	20.0729
1106.27	488.731	1083.26	0.800501	55.2892	32.9516
1052.71	887.018	1161.34	0.983765	32.4782	45.2178
1131.99	1343.97	1306.22	1.48421	35.8329	46.5596
477.726	1467.1	1022.49	1.14501	61.2495	26.1726
539.821	1293.07	1216.04	1.53743	64.1591	21.8653
1184.76	571.312	1196.25	0.751004	42.6194	41.0767
1110.65	619.49	1207.95	1.22886	62.3826	31.8274
877.904	787.557	1326.62	0.946132	25.6167	33.6312
1142.93	586.939	1269.56	1.00128	44.5618	34.2633
676.799	1168.21	1255.64	1.19042	67.0096	27.0874
900.537	1057.57	1123.59	1.5281	89.0392	32.6719
1051.77	1445.86	1007.46	1.95079	34.6891	54.2966
1114.56	606.552	1274.36	1.28452	54.1455	33.0519
1208.8	1469.71	1089.33	1.60316	25.2743	60.1724
1418.67	847.085	1009.39	0.706563	75.3762	57.4594
1220.18	456.696	1165.88	0.99258	41.0141	38.0948
795.906	1306.51	1104.49	1.39558	48.854	42.1573
462.482	1087.71	1262.23	1.80205	12.8475	29.7987
768.008	794.053	1040.26	1.18839	42.41	32.955
1372.76	734.895	1209.64	1.40065	96.8333	39.1349
716.786	668.534	1082.38	1.74397	68.8511	20.6553
455.811	880.673	1104.71	0.781552	65.7123	22.679
694.277	1175.81	1110.15	1.97075	90.2349	22.7705
810.079	790.552	1114.71	0.766394	96.0696	32.8474
828.131	601.836	1118.11	0.73957	44.4651	29.1653
793.829	1125.03	1023.25	1.98706	11.0676	44.0606
1026.96	654.341	1275.46	1.93078	42.4243	33.4112
1367.05	951.874	1081.51	0.669857	90.4417	51.5973
852.821	1170.7	1312.66	0.510497	39.9913	33.5914
800.242	718.468	1311.36	1.0299	48.8349	25.1814
1485.13	1389.93	1164.66	1.56755	97.6125	58.1241
507.294	1195.52	1322.69	0.649351	17.5199	24.6615
1436.61	748.131	1265.12	1.64189	24.64	44.6416
1482.02	1117.89	1299.03	1.88386	81.1952	43.1934
510.354	1344	1296.91	1.25973	32.6001	26.5266
1416.63	514.654	1217.66	1.42763	95.9249	38.0307
556.186	1467.81	1023.94	1.78944	73.9467	27.4368
943.167	519.96	1264.47	1.9186	64.3213	24.9634
901.273	1323.32	1270.04	0.562348	53.7562	40.3891
475.228	1087.12	1211.6	1.05779	29.9967	24.0692
1285.44	527.723	1218.33	0.842353	68.4846	39.3637
1098.66	598.635	1206.11	1.83184	84.8492	30.463
583.19	978.569	1065.71	1.59255	63.379	27.6658
1184.92	1387.88	1268.41	1.00959	11.6896	45.5496
1084.74	771.409	1312.35	0.784244	19.2769	36.5541
1371.88	1136.32	1020.51	1.2633	24.6139	59.9566
665.438	1255.48	1339.22	0.666428	86.7967	29.2826
473.175	1207.5	1204.37	1.87401	23.191	25.6038
671.418	893.832	1061.26	1.31772	26.9634	32.796
1018.19	647.461	1010.49	1.3576	85.1786	33.2824
525.902	1344.09	1168.05	1.2289	37.4694	31.8185
597.473	634.794	1005.05	1.69651	81.7184	19.7733
1431.78	1193.63	1070.96	1.09526	78.5413	56.9776
716.132	1079.9	1305.69	0.91143	36.8538	29.5411
1361.48	594.82	1163.79	1.89878	56.6798	41.7592
726.465	1036.94	1230.71	0.979336	34.9921	35.0362
1409.21	1181.11	1138.2	1.24492	21.8126	58.0924
1319.79	1430.75	1043.87	0.754896	71.4104	64.8222
792.233	1068.43	1182.82	0.68597	85.8661	32.1189
1158.78	1178.33	1002.26	1.04455	69.2383	52.4826
606.768	1085.2	1299.85	1.10747	54.672	25.6093
1253.76	1081.45	1002.59	0.985186	83.5167	50.2206
641.945	1483.07	1326.22	1.71128	59.1867	26.0934
1221.3	1211.7	1023.76	1.04647	41.4755	60.8612
1173.19	829.914	1288.98	1.11786	83.6973	37.0044
559.361	1429.57	1102.58	1.93588	57.8043	24.8028
516.417	1342.34	1101.09	0.634186	15.3257	30.2053
792.964	1485.63	1228.96	1.5233	35.8525	40.0902
1150.35	751.333	1291.31	1.65331	20.2785	39.912
734.706	1148.86	1267.61	0.738573	96.0809	29.951
869.31	596	1204.98	0.616475	95.0937	32.2555
607.287	812.977	1003.71	0.523478	49.4693	33.3334
568.949	589.948	1343.32	1.58813	11.4386	21.5325
1104.63	1107.94	1314.46	1.42899	82.6136	35.9141
1128.96	1313.24	1288.37	1.06708	48.8978	45.198
1064.32	813.769	1015.7	0.562353	76.7806	43.8298
503.88	1340.04	1016.24	1.84049	70.1343	21.3327
1065.67	1422.03	1278.56	1.66734	76.0684	36.526
1369.93	536.511	1332.07	1.32785	34.4049	41.4495
741.809	787.457	1226.94	1.68889	29.9322	28.242
1375.13	1387.82	1119.26	0.546763	80.6369	61.9349
602.454	807.872	1016.08	1.10388	46.0782	27.7132
1401.36	481.864	1089.63	0.87846	38.6807	46.5179
1312.3	484.173	1112.12	1.33982	53.4158	39.5582
1016.62	1008.05	1173.95	1.06811	25.4316	45.7622
1299.08	1303.11	1014.88	0.563413	31.2991	50.4363
811.64	592.642	1051.88	1.59746	54.2857	27.1741
747.697	1427.5	1103.48	0.932598	35.1741	41.0434
649.018	1226.38	1037.62	1.59325	45.5808	34.5992
733.013	951.812	1177.41	1.3294	35.4118	31.0475
656.309	1263.62	1333.79	0.560372	44.8365	33.3323
1177.59	743.931	1203.99	1.20615	72.05	37.1905
464.265	525.83	1024.03	1.14043	85.2678	18.1525
929.176	493.316	1169.09	1.02323	41.3491	32.259
756.614	688.389	1006.16	1.56075	53.6434	30.5039
1183.43	467.546	1066.8	1.59636	68.1742	35.0924
802.549	1002.29	1175.3	1.37286	57.1429	33.1504
1458.55	891.75	1051.53	1.38508	23.8216	61.5472
1000.26	980.598	1201.99	1.64014	86.472	30.8588
1403.44	536.918	1044.54	0.907505	15.8489	48.296
1433.19	668.317	1149.13	0.97531	23.4562	46.8243
1494.82	1438.68	1110.54	1.66651	89.7082	59.0785
771.374	750.143	1301.59	1.75154	31.0208	26.6553
1347.64	1164.64	1164.9	1.86521	53.9865	51.1154
833.495	1224.65	1056.81	0.554672	66.9973	41.1975
994.079	732.085	1311.81	1.20395	99.0756	32.2379
520.175	1187.73	1125.77	0.987832	81.9536	24.2915
870.985	972.923	1176.54	1.8251	20.2958	39.2503
1346.5	1076.43	1130.98	1.16888	56.9263	52.5974
1357.88	505.504	1084.59	1.81122	51.5976	41.6597
1472.83	1354.19	1265.09	1.08078	92.2302	56.3241
557.142	959.901	1190.38	0.605744	97.7963	21.9724
1143.97	1081.57	1016.19	1.29956	11.3366	55.0027
1380.85	1360.21	1273.4	0.818261	70.9346	56.252
1186.24	981.587	1014.34	1.07496	57.8611	50.1548
1254.22	458.733	1172.78	1.69567	68.0901	35.1449
1344.06	1005.85	1230.14	0.876106	27.21	50.78
545.901	598.696	1112.31	0.548035	58.1944	21.5015
1037.1	702.794	1331.79	1.70253	18.7247	35.4928
480.641	905.82	1038.22	1.19113	19.1446	30.4008
1471.01	991.174	1137.68	1.17703	61.1803	53.795
467.46	1498.4	1145.34	0.698526	93.1151	26.5975
527.178	934.582	1251.5	0.837297	28.1228	26.3135
597.623	788.88	1150.82	0.789814	57.8811	25.8736
1039.67	847.612	1106.15	0.835319	71.1429	43.1873
779.677	980.34	1269.35	1.8309	46.1882	24.4158
772.027	1334.24	1030.71	1.25774	39.5472	43.6351
906.422	1477.56	1030.8	1.32941	59.5334	46.407
701.115	730.053	1136.87	1.57447	17.4033	33.7835
898.552	1097.89	1056.54	1.61615	15.0338	46.2764
534.292	824.337	1077.57	1.83478	76.6458	20.8249
1440.1	553.962	1228.04	0.714014	16.0263	31.621
1348.86	761.316	1343.58	0.714736	77.7543	43.1272
1257.86	931.855	1098.97	0.649104	56.1114	51.4728
1058.54	507.505	1128.68	1.18963	90.7112	34.6948
481.732	1368.53	1185.97	1.36438	21.7453	28.1623
695.337	1444.8	1173.05	0.543883	54.2891	40.1208
649.8	1040.14	1344.96	1.32324	50.4461	25.6796
1009.69	1458.25	1307.13	1.52861	86.0638	35.211
702.993	1307.14	1136.72	1.28685	99.4813	30.9235
1163.7	904.179	1235.96	1.44667	37.2229	41.5086
1359.15	964.294	1230.44	1.61555	26.4605	53.8613
1336.31	794.989	1123.26	1.95962	75.8133	43.9828
887.296	1105.81	1095.45	1.48932	11.7684	47.3639
1222.16	717.61	1039.21	0.901842	40.0772	48.8206
499.193	580.016	1172.42	1.72303	40.3931	15.6157
643.606	566.051	1199.48	1.35892	72.0928	18.9822
583.255	1180.47	1174.98	0.805838	73.1466	30.3826
869.01	1103.68	1270.36	1.20642	99.171	31.2215
1276.61	859.858	1296.9	1.11048	24.0873	48.2222
1163.07	814.11	1143	0.708241	82.9894	41.8623
461.377	756.498	1175.86	1.87276	95.151	9.17084
697.791	944.62	1108.87	1.10541	39.0422	34.9719
1453.93	649.081	1140.04	1.76494	56.1665	43.6707
480.653	1049.44	1181.82	0.857309	49.4291	27.4852
1050	551.745	1030.07	1.39916	22.1114	42.2198
1299.93	1409.57	1063.39	1.39965	15.5827	65.0072
1206.27	1119.77	1279.32	0.648363	66.4169	46.2938
720.992	960.018	1190.07	1.37581	43.9117	30.554
1198.13	673.557	1324.73	0.819748	89.6477	37.1688
1236.17	1184.03	1314.35	1.19374	45.5408	46.7005
576.494	1095.36	1148.78	1.85052	77.1362	24.3018
1259.59	1276.9	1271.57	1.59531	67.3957	42.7701
887.834	1244.41	1092.1	0.775198	40.8878	44.3857
1344.34	1129.73	1053.94	0.885889	76.9913	53.9803
1054.31	769.129	1009.43	1.04006	67.8945	40.3161
998.375	948.166	1006.2	1.3172	29.5396	41.9092
677.781	878.49	1179.97	1.38285	10.636	32.1491
1082.04	982.964	1338.95	1.20226	43.0863	37.7252
917.398	716.771	1224.58	0.908577	88.9676	30.6322
629.634	1207.03	1296.01	0.987985	42.6033	31.7528
1204.99	1055.26	1323.57	1.95536	78.2361	33.2464
1172.61	1438.35	1251.19	1.98119	10.1031	56.6173
1425.46	514.108	1107.39	1.74563	14.9995	51.6225
786.268	657.217	1240.76	1.19017	12.0681	30.9669
705.098	1054.82	1213.33	0.972693	54.7894	34.8165
587.803	1193.9	1263.99	1.61368	90.4426	18.767
768.217	983.563	1259.16	1.58547	73.9848	29.74
840.717	1298.88	1002.04	0.950369	56.3916	48.2478
1160.14	504.233	1021.76	1.32504	90.0041	33.776
1474.38	829.161	1007.15	0.884067	27.4225	59.0901
718.437	1071.09	1313.01	0.723647	24.8636	35.5158
782.364	1235.59	1298.46	1.90759	83.2494	24.4507
1172.38	580.358	1140.11	1.54849	78.5495	35.1224
573.738	752.24	1232.31	0.596242	82.6658	25.9804
775.101	749.038	1292.4	1.08752	99.4353	22.2304
1031.55	1150.16	1187.57	1.74001	34.0133	43.168
1279.63	1412.31	1291.65	0.521451	48.6931	48.2693
672.844	1017.17	1337.96	0.592109	12.0133	18.6416
1166.64	493.862	1111.38	1.34838	48.0639	37.4331
1294.52	1043.95	1295.05	1.63986	32.0864	48.1776
1146.05	1034.49	1021.44	0.616102	40.7555	52.4743
1121.04	1182.66	1248.81	1.81432	20.9582	45.3656
817.714	1242.34	1324.14	1.28741	30.0311	35.0247
736.596	1301.25	1037.49	1.28244	10.3689	43.6399
1210.47	628.872	1044.79	0.979613	32.2788	45.7405
847.644	641.837	1227.52	1.95989	49.2849	25.9857
1035.48	1193.5	1133.26	0.79467	19.1931	43.8208
1332.93	1404.46	1120.71	1.0418	65.239	56.7395
1374.38	525.238	1013.39	1.88647	49.2185	42.1125
562.393	730.916	1308.54	0.728748	63.2335	22.7797
1431.51	781.075	1144.44	0.605349	95.3372	49.8251
1124.93	716.736	1221.76	1.31138	68.4921	33.164
1059.83	772.665	1092.31	1.78165	85.0282	34.1057
1211.71	1003.93	1303.91	0.628697	43.3309	47.2766
1157.39	958.071	1302.44	0.996463	77.1043	37.7959
1467.92	1447.99	1053.2	1.00318	45.6238	70.8697
477.103	1114	1256.53	1.41666	33.4603	23.4554
1085.23	1360.63	1070.76	1.3728	44.7041	52.2935
936.641	930.523	1130.02	1.6565	65.8512	34.1901
889.843	1320.28	1169.56	1.45715	18.0846	49.0127
1102.02	524.401	1030.91	1.49004	73.8874	35.9543
733.934	1068.99	1199.6	1.21485	41.8463	31.0629
[truncated: 1 more rows]
